# Supplementary material for: iTRAQ-based quantitative proteome and phosphoprotein characterization reveals the central metabolism changes involved in wheat grain development
Source: PubMed Central journal article supplement (PMC4301063; doi:10.1186/1471-2164-15-1029), 2014-11-27

Additional file 7: Figure S4: Representative representative MS spectras for phosphopeptides for identified peptides and Uniprot ID of corresponding proteins.

# B6VCM0/ P12299

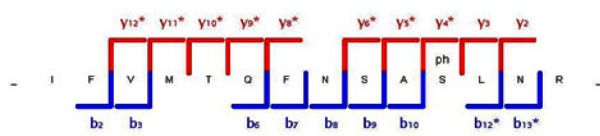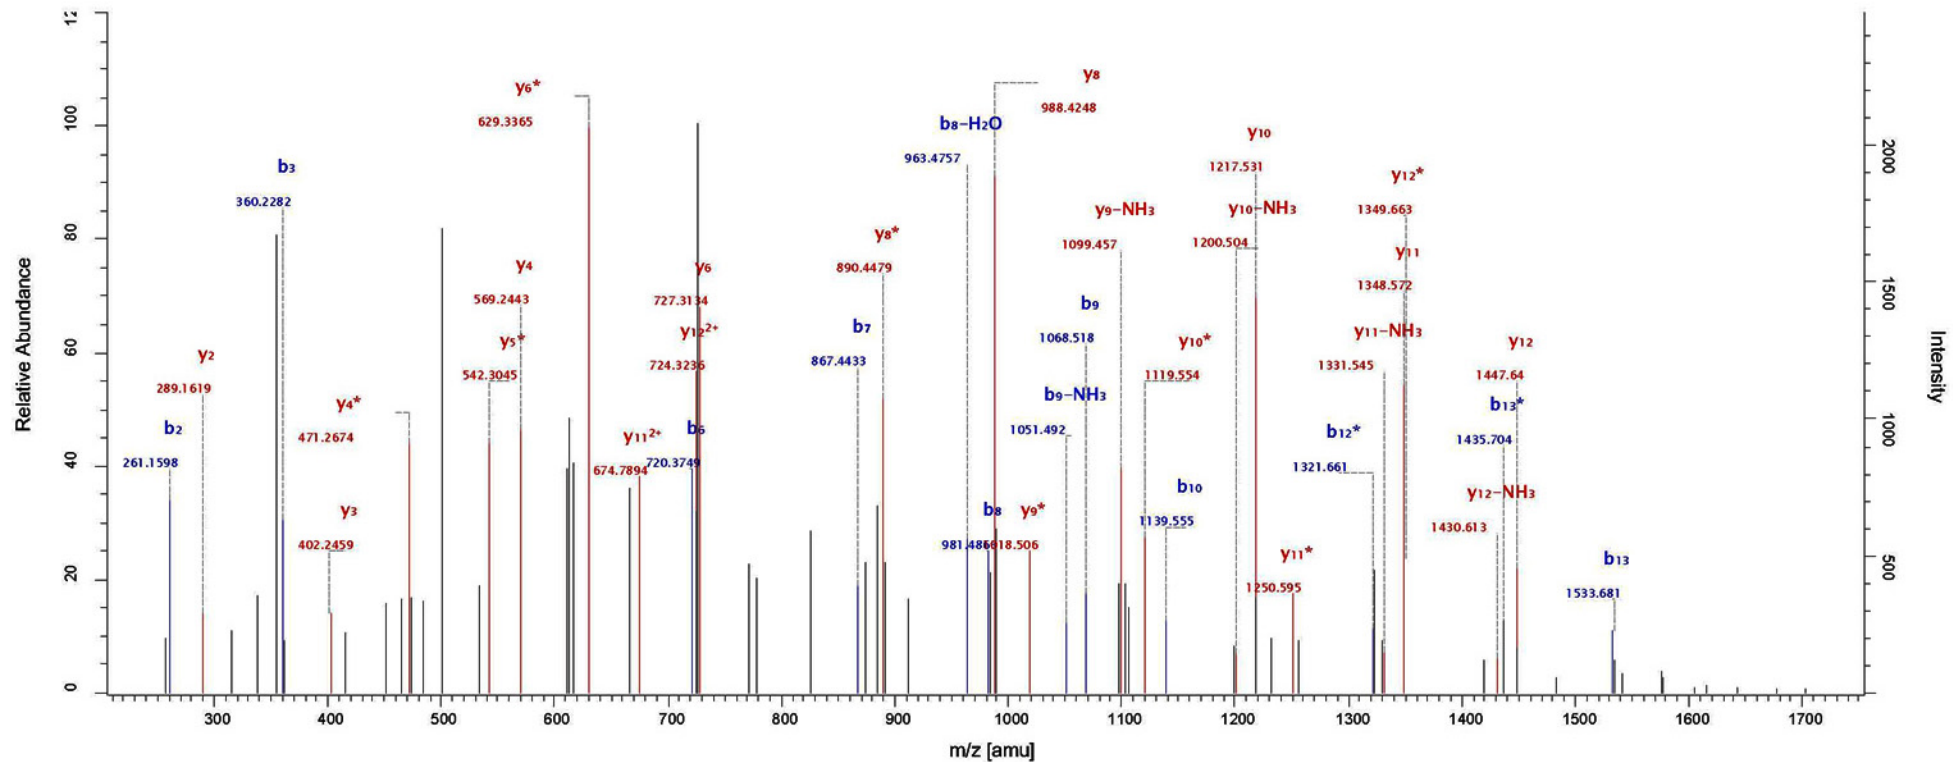

# P12299

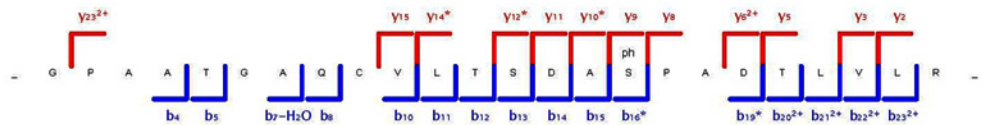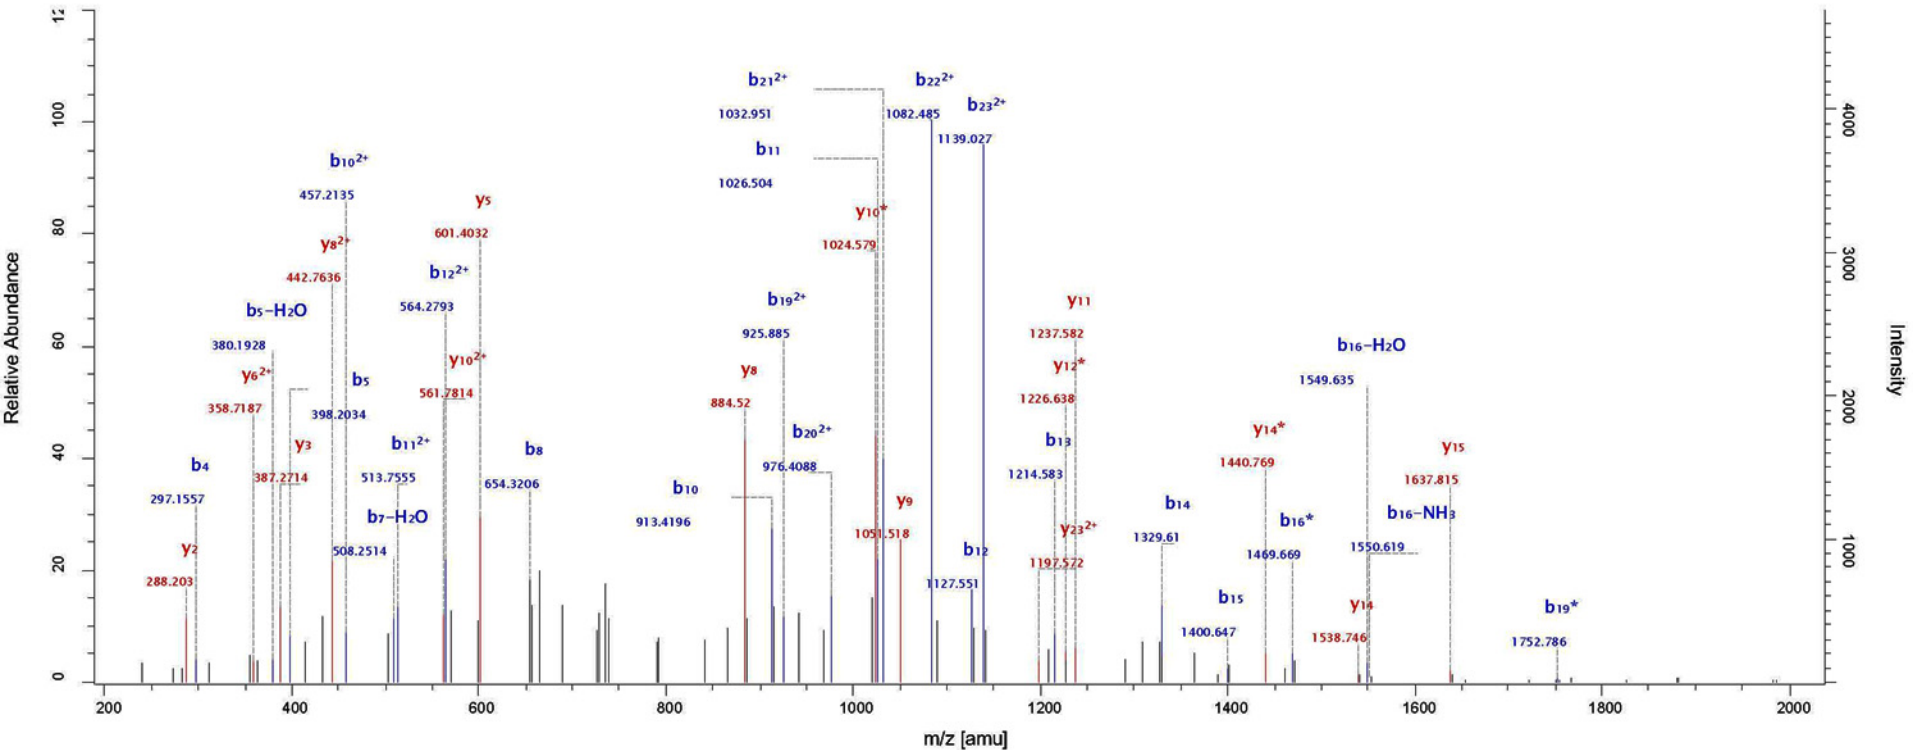

# Q9M4Z1/ Q5XXD1

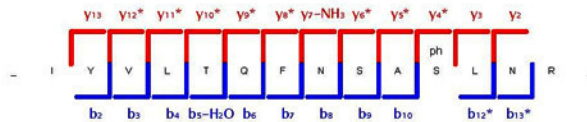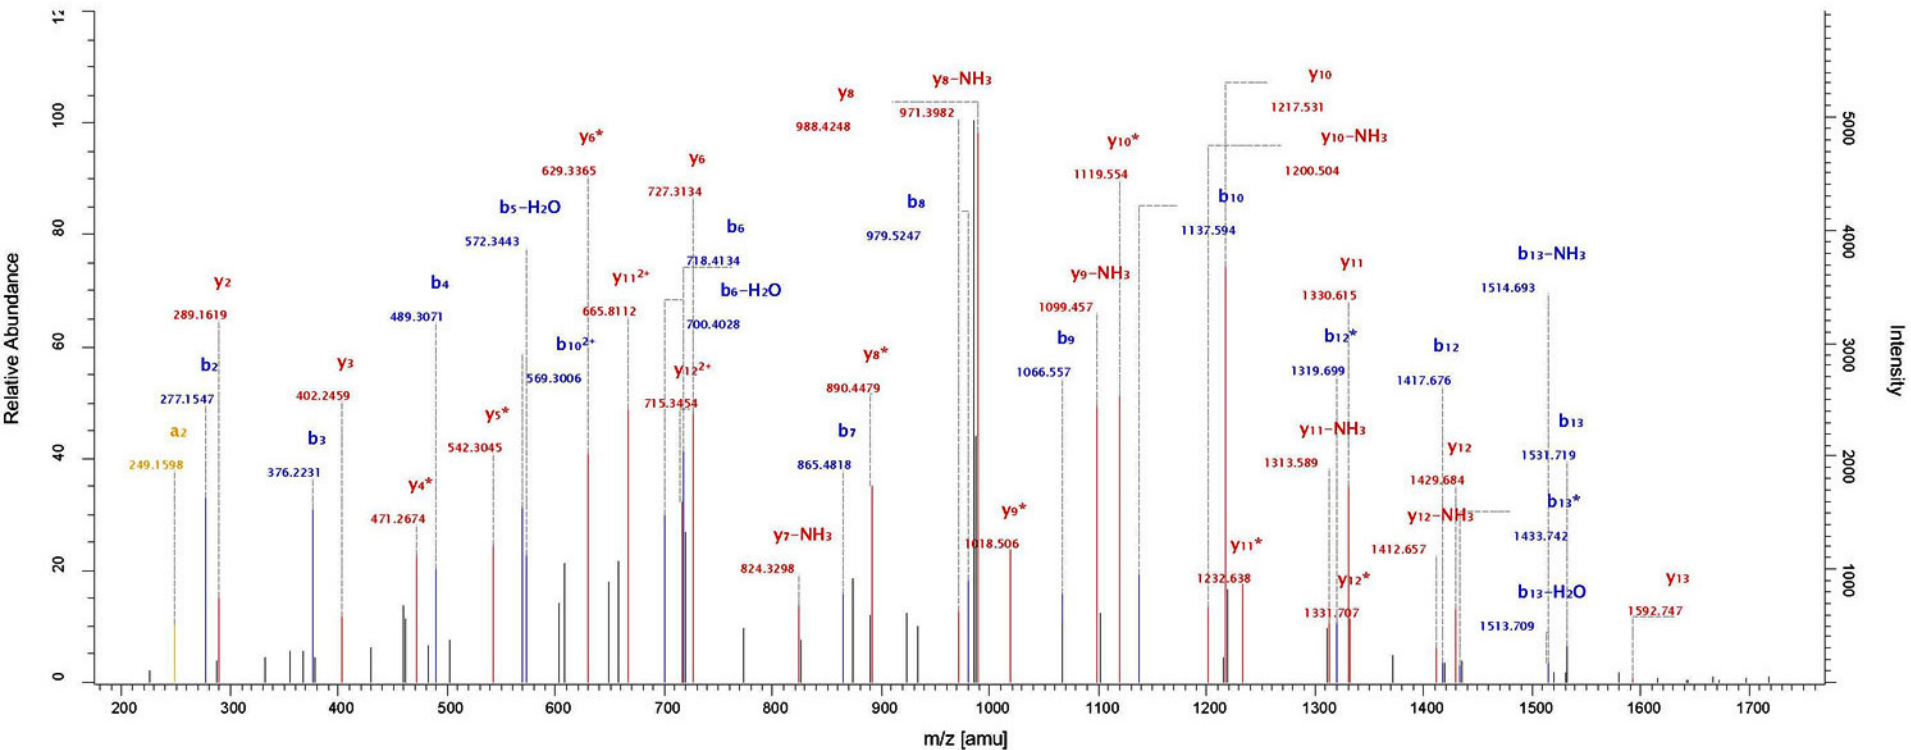

# P93594

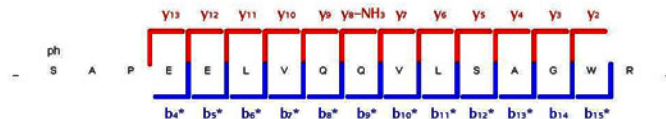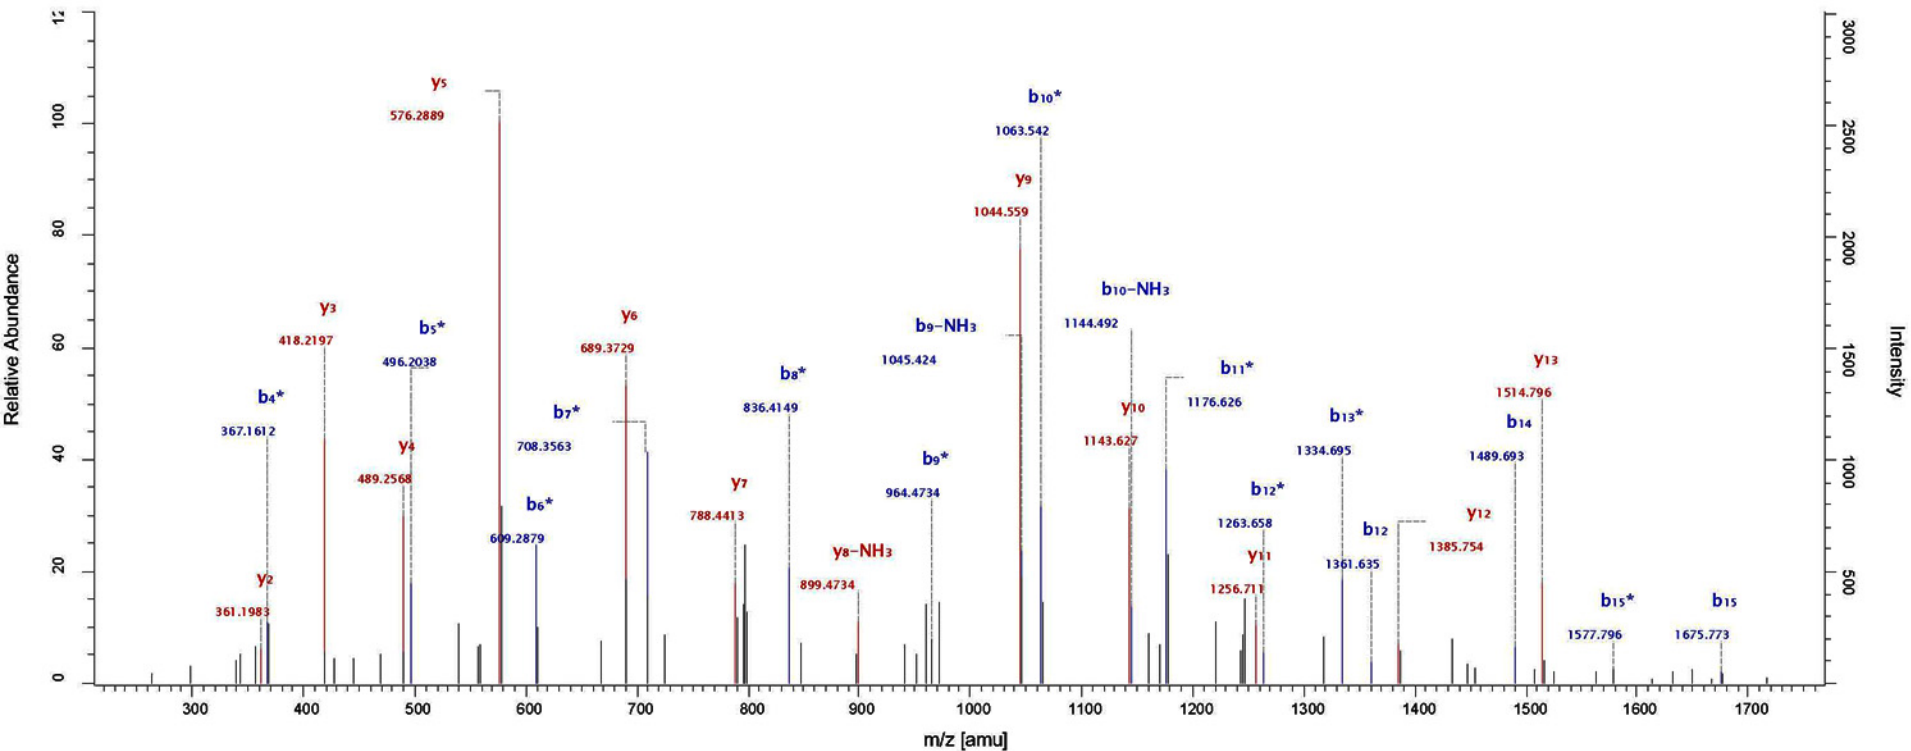

# Q43223

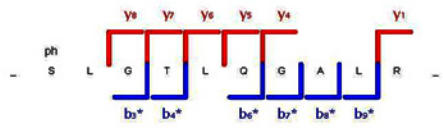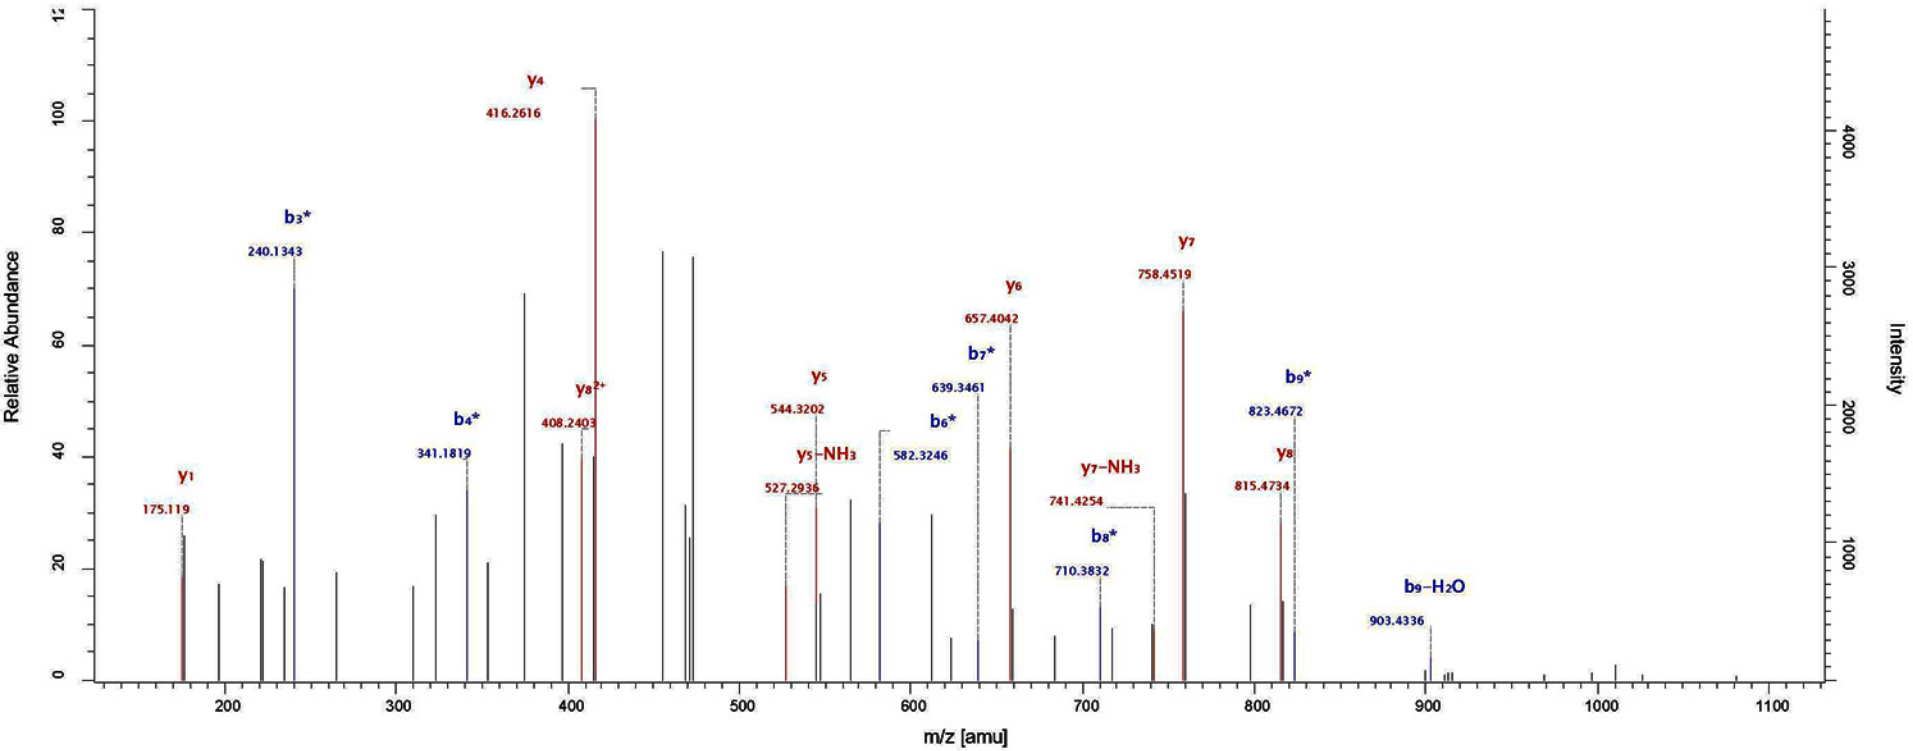

# A9U8G4

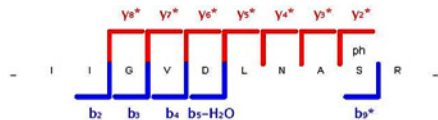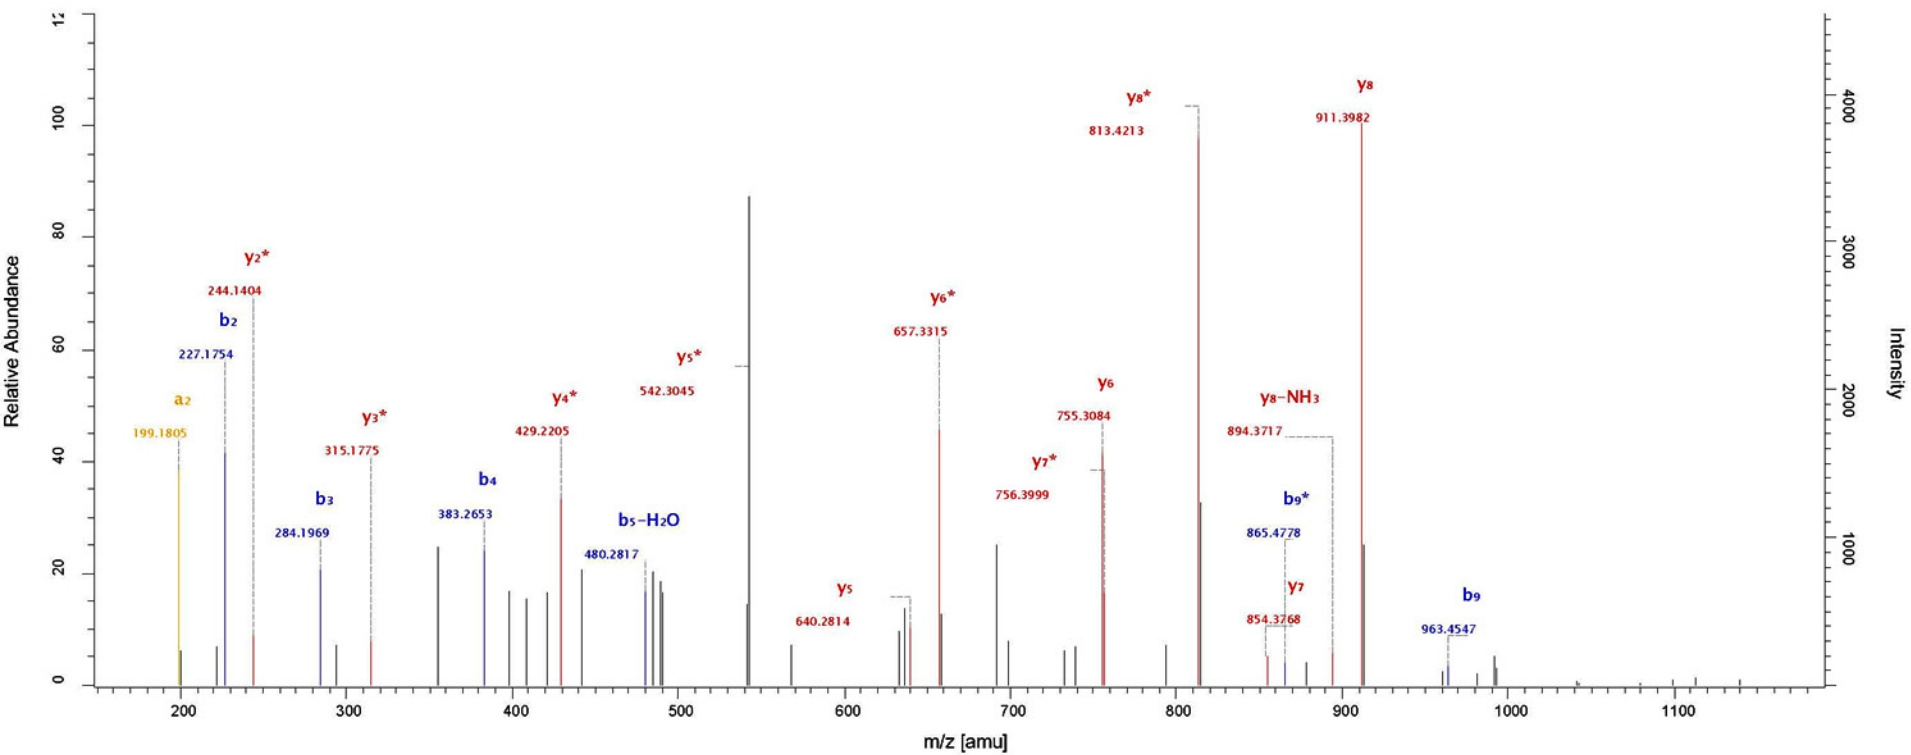

# Q6UZD6

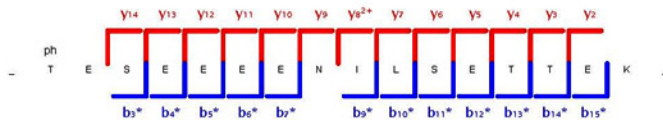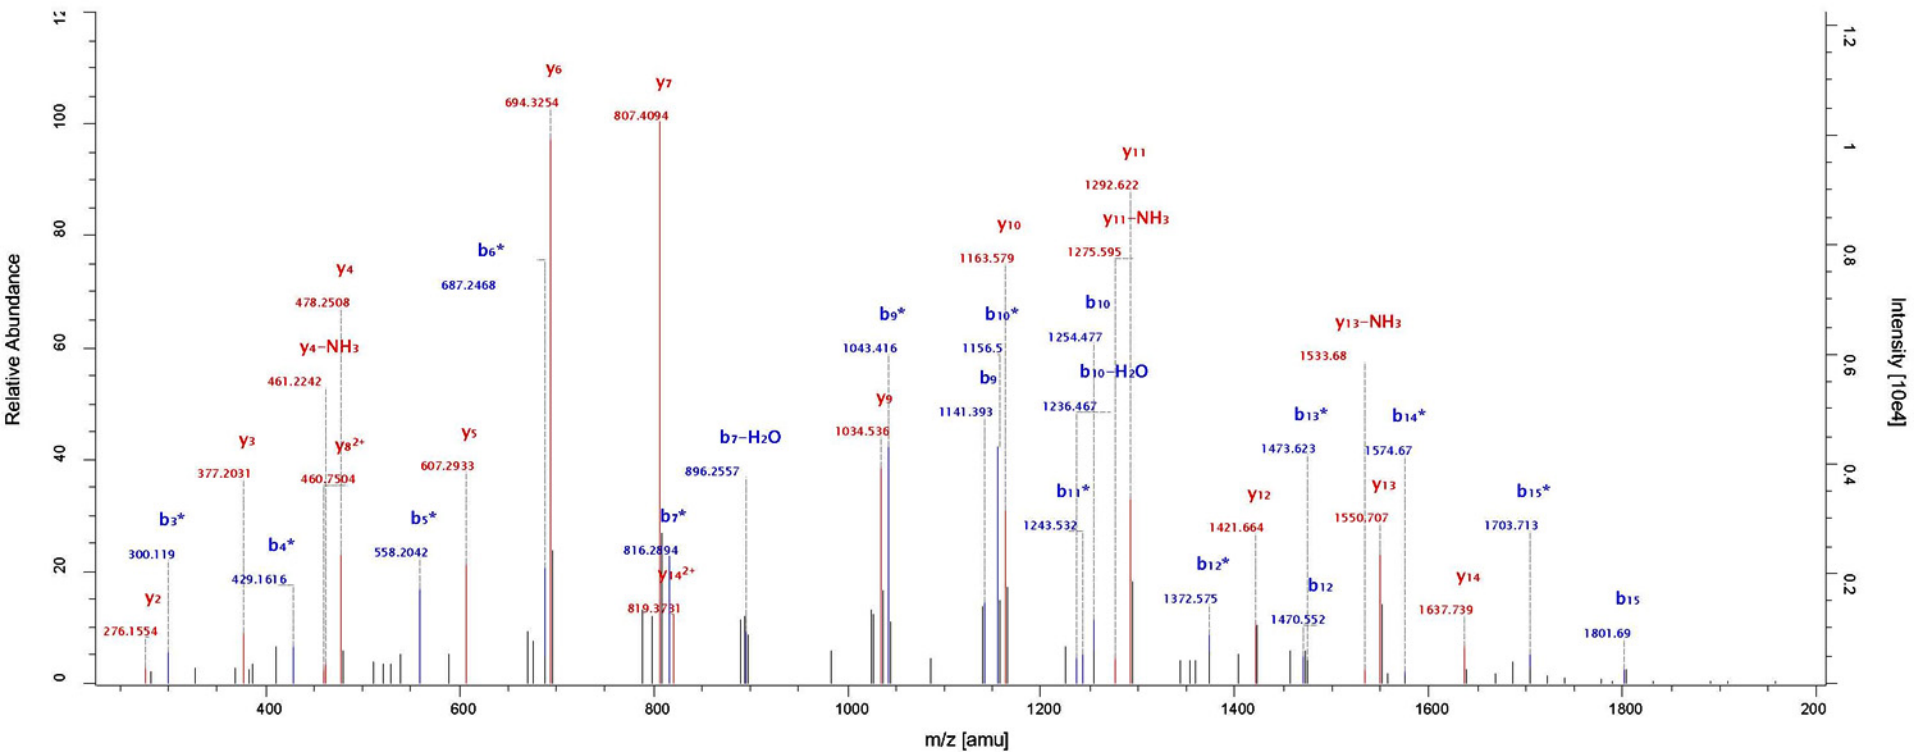



# Q6UZD6

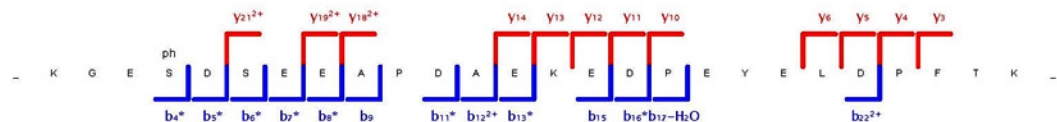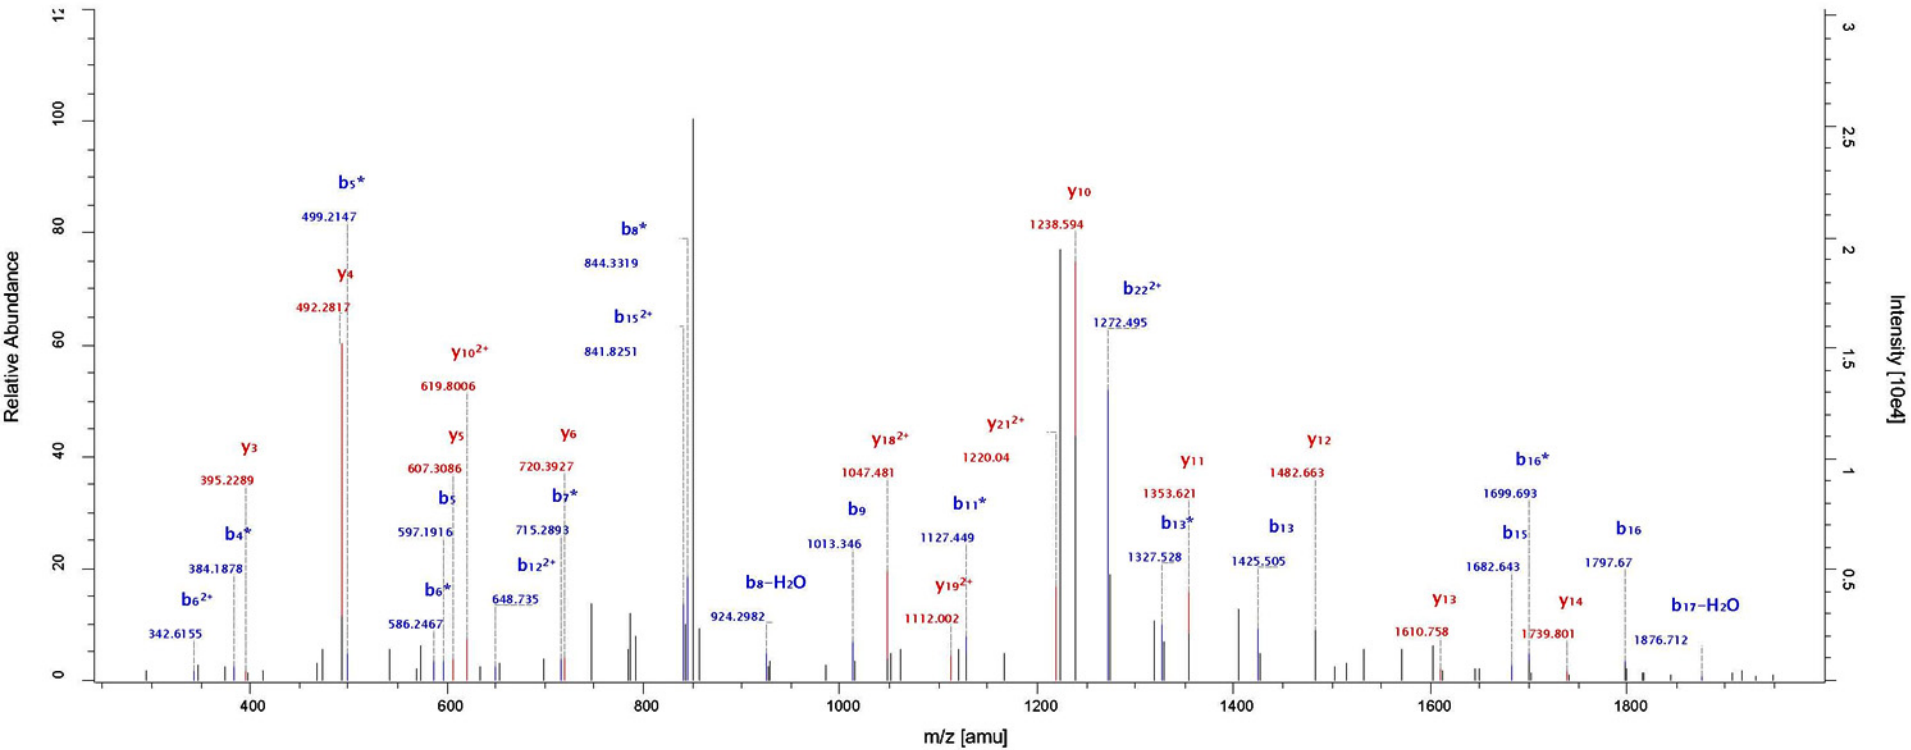

# Q8GV49/Q8GV47

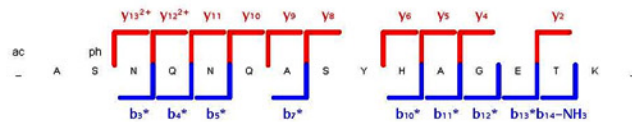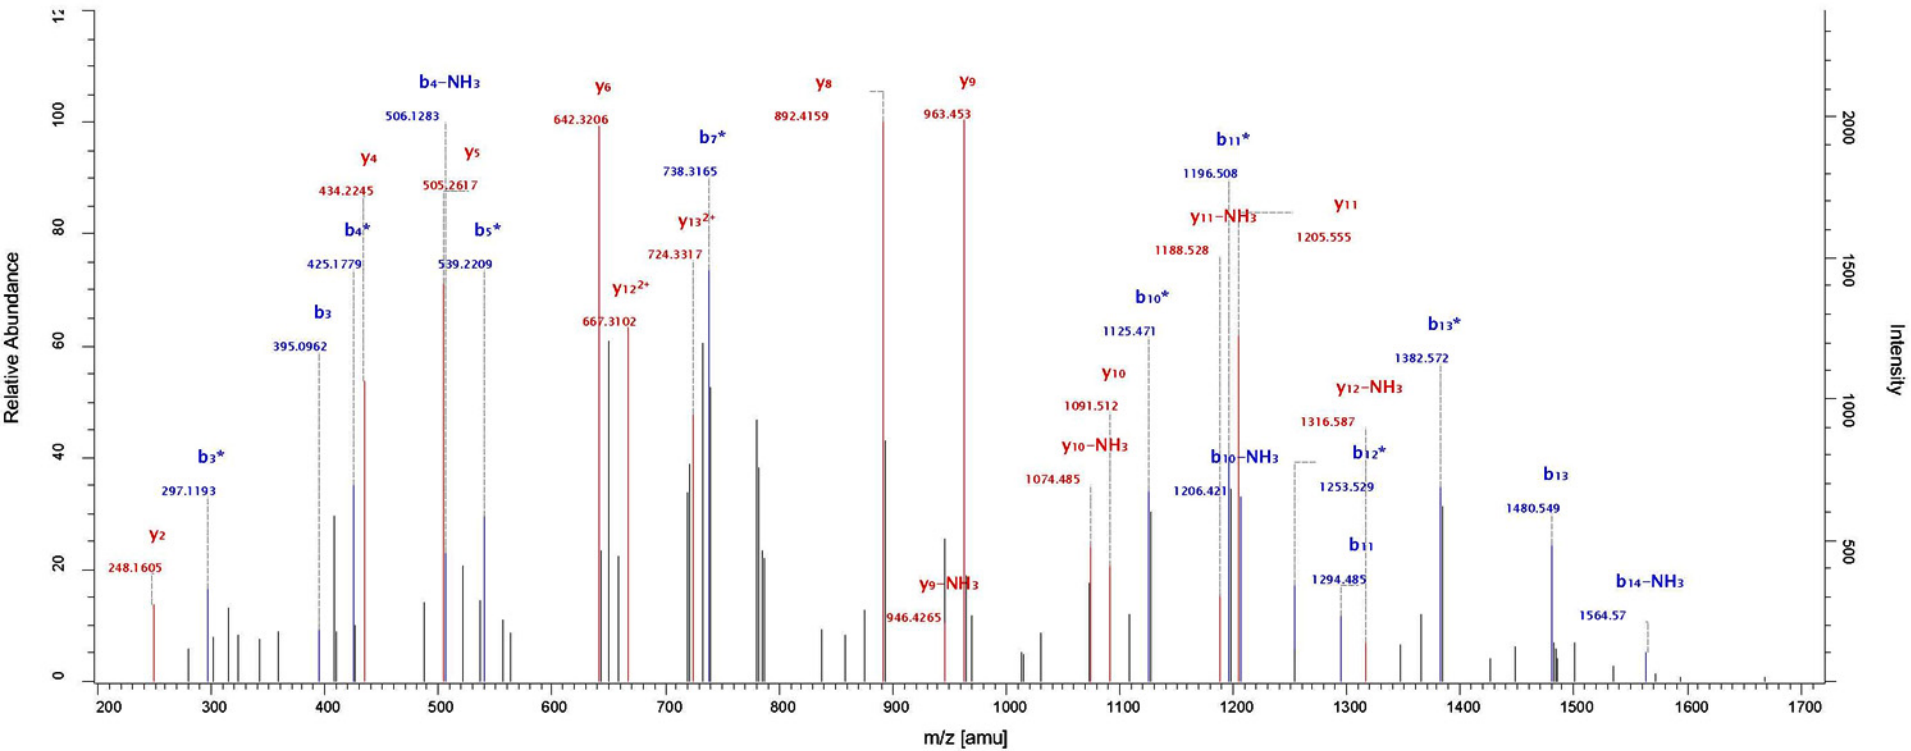

# Q8GV49

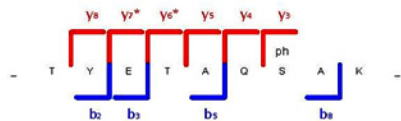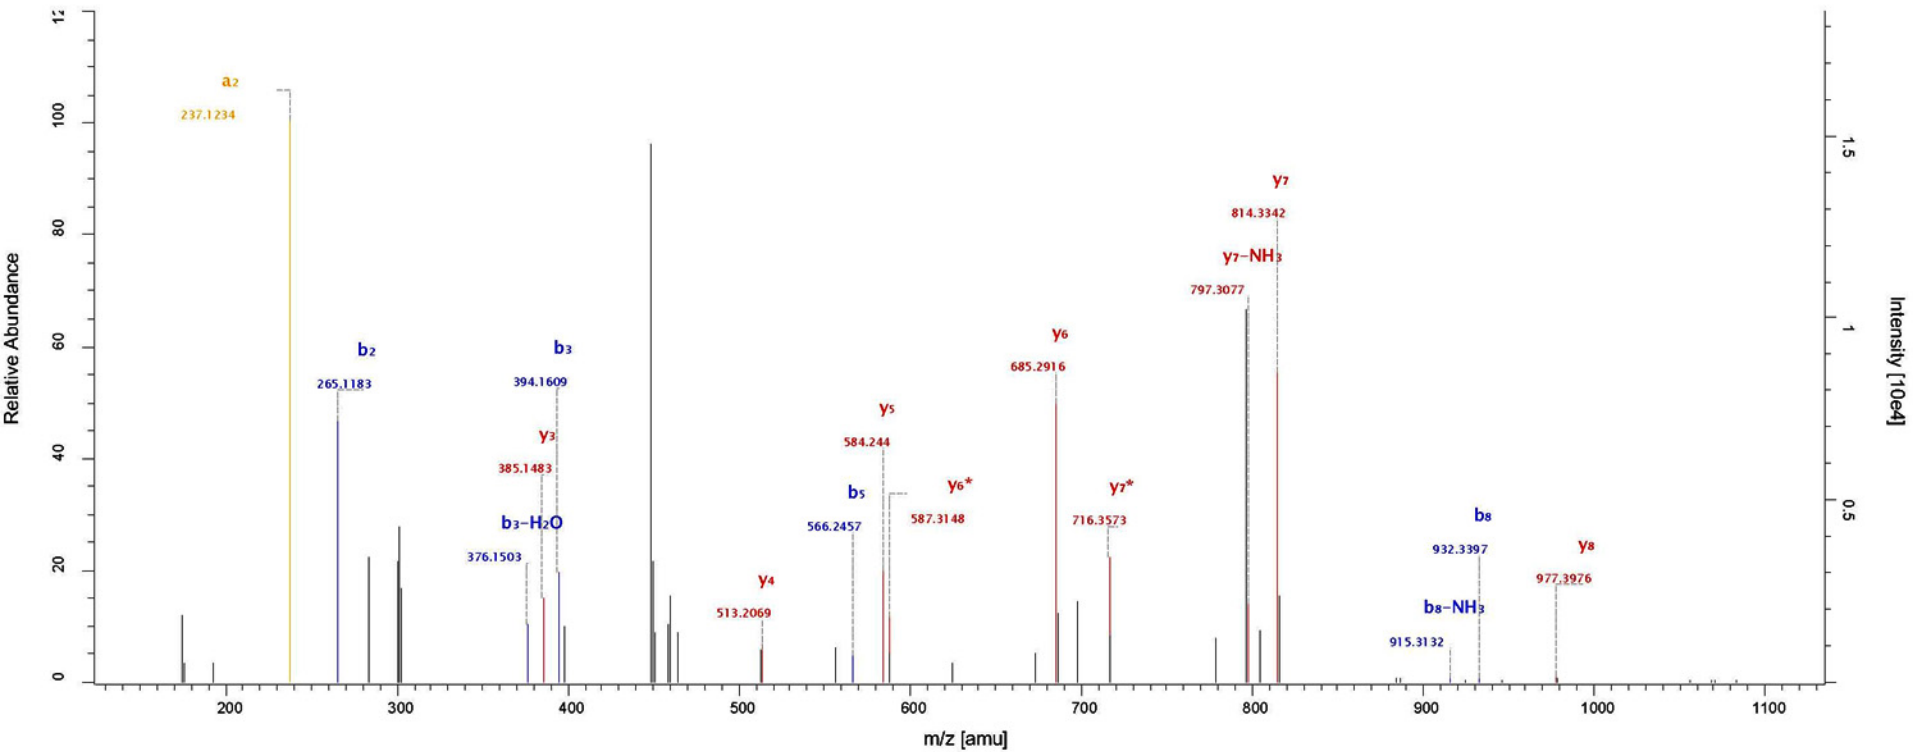

# Q8GV49/Q8GV47

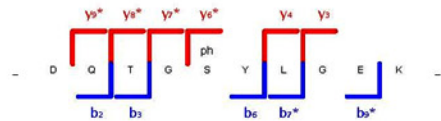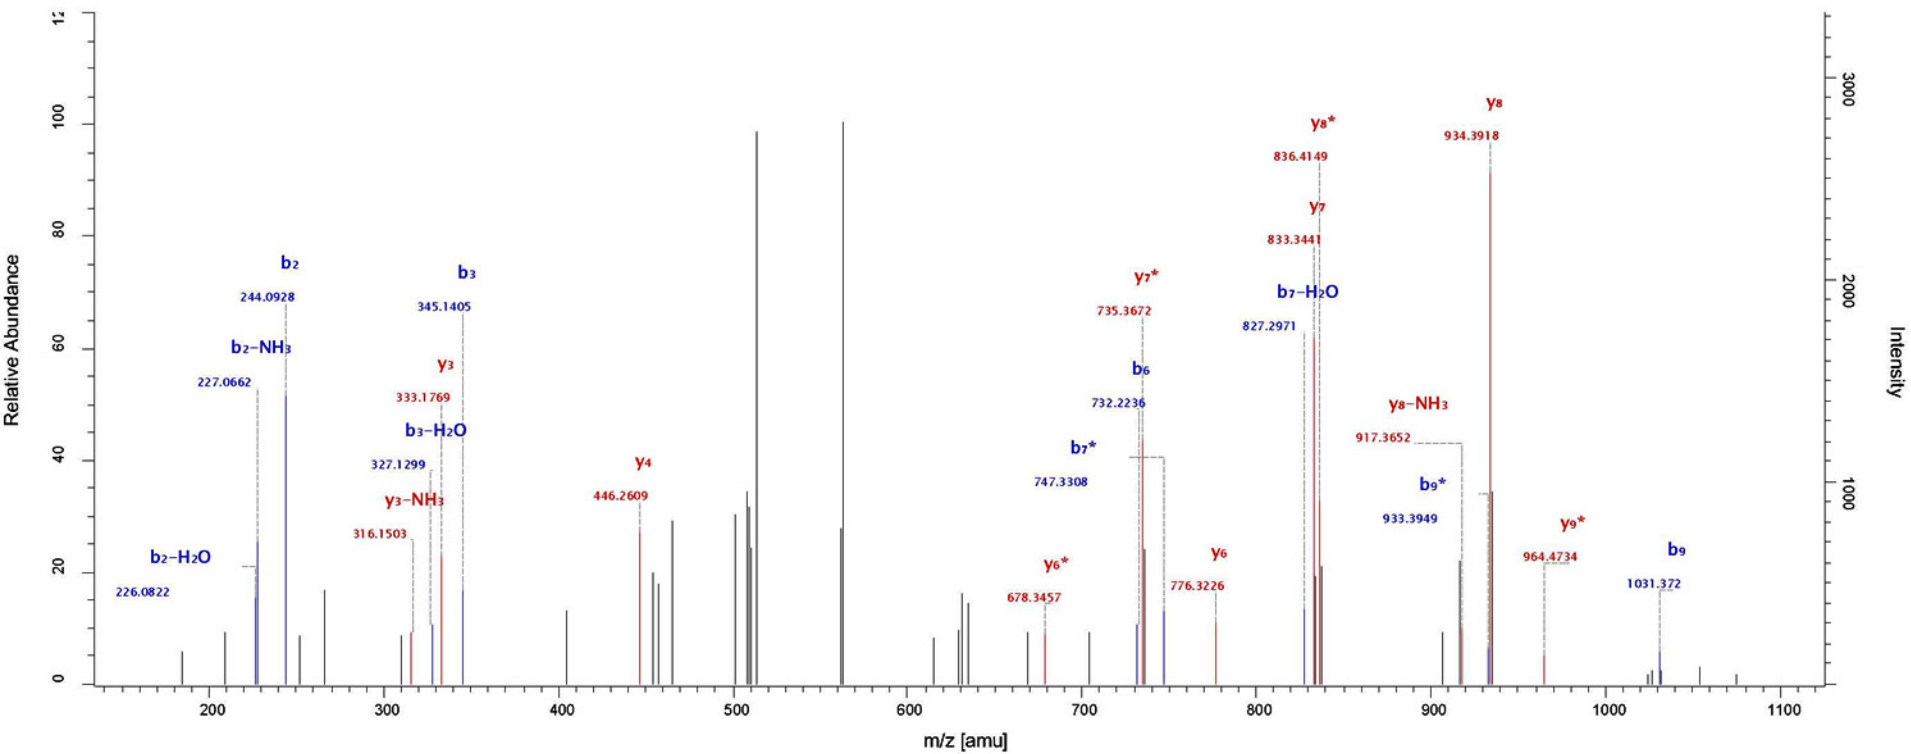

# P42755

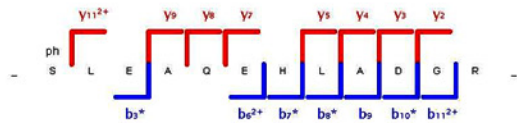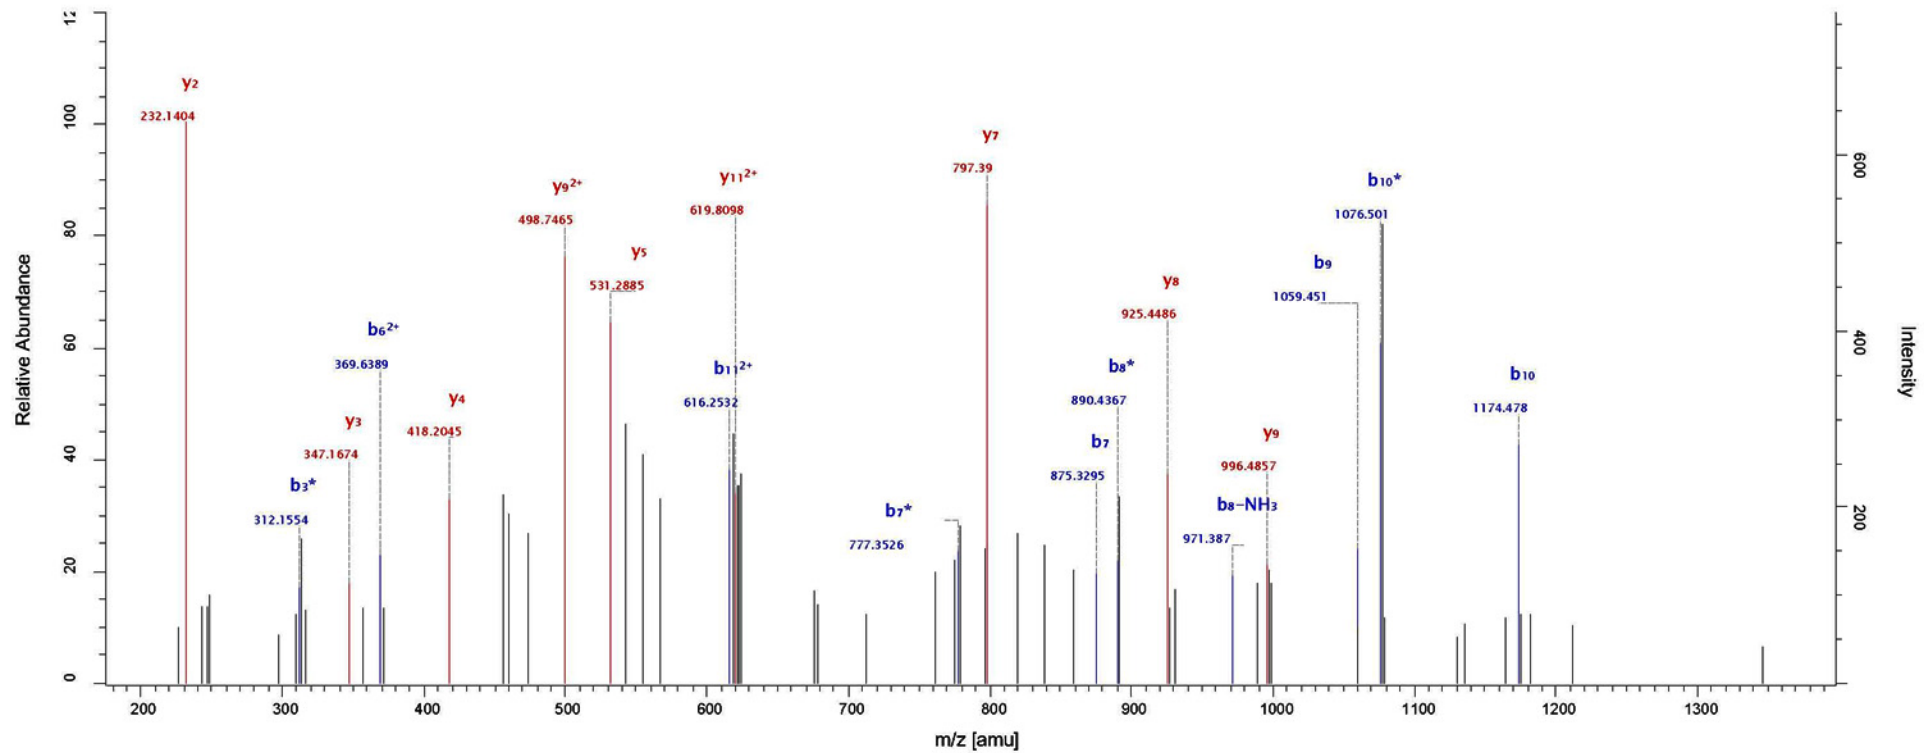

# P04568

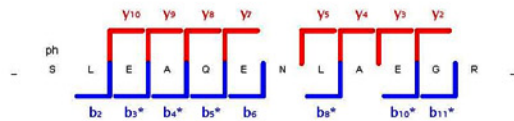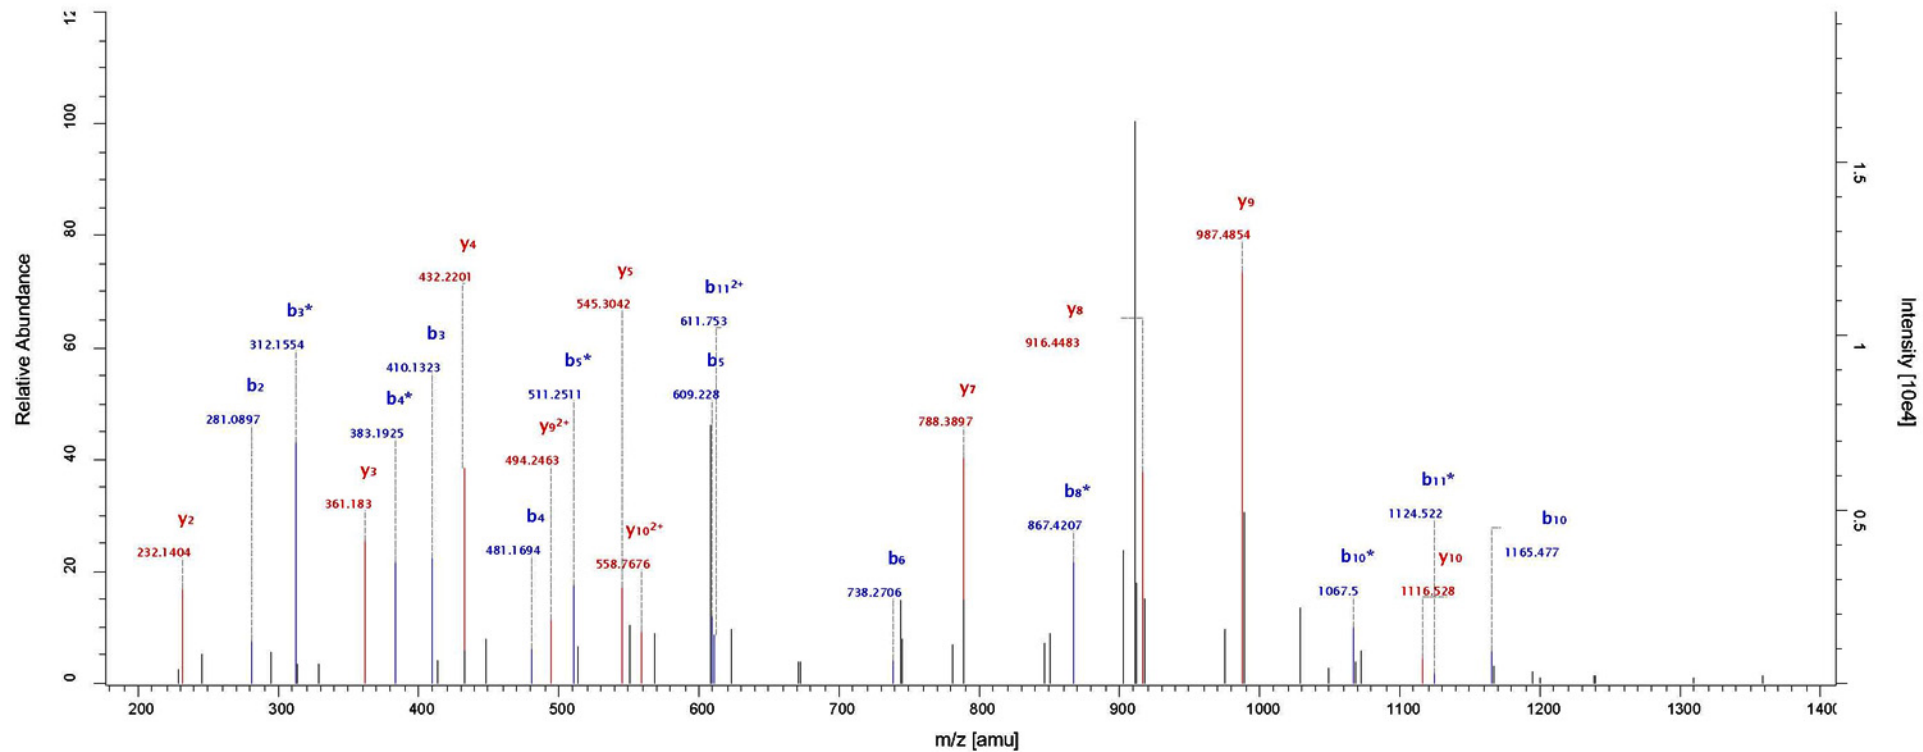

# COLF32/ H9AXB3/ Q41593/ Q9ST57

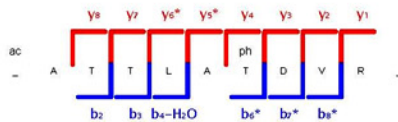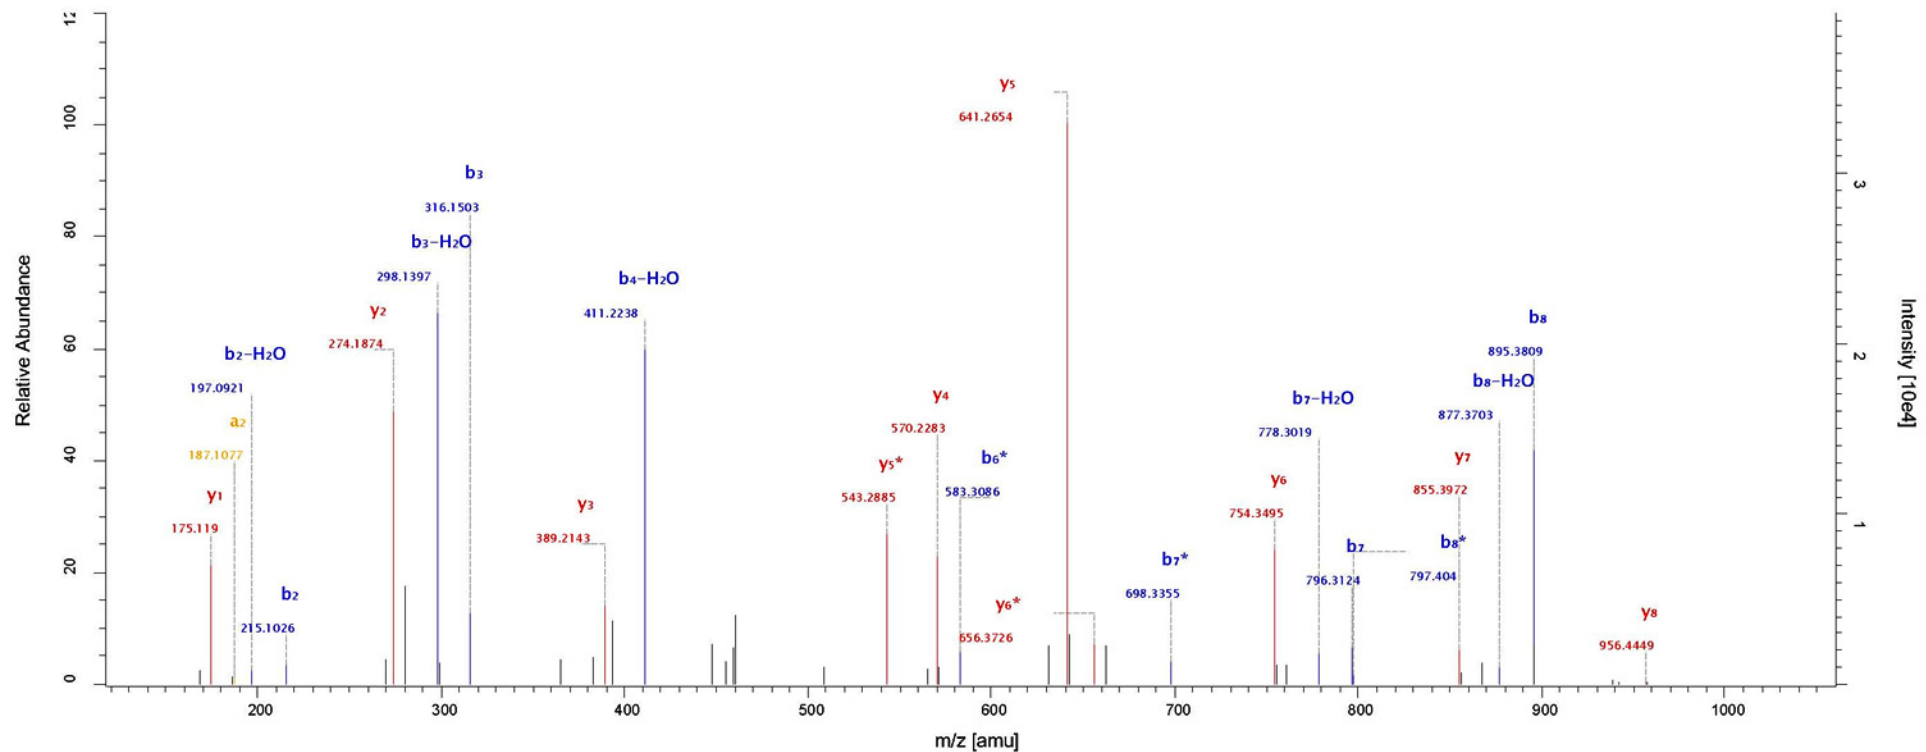

## COLF32/ Q41593

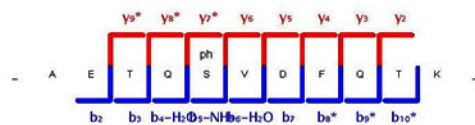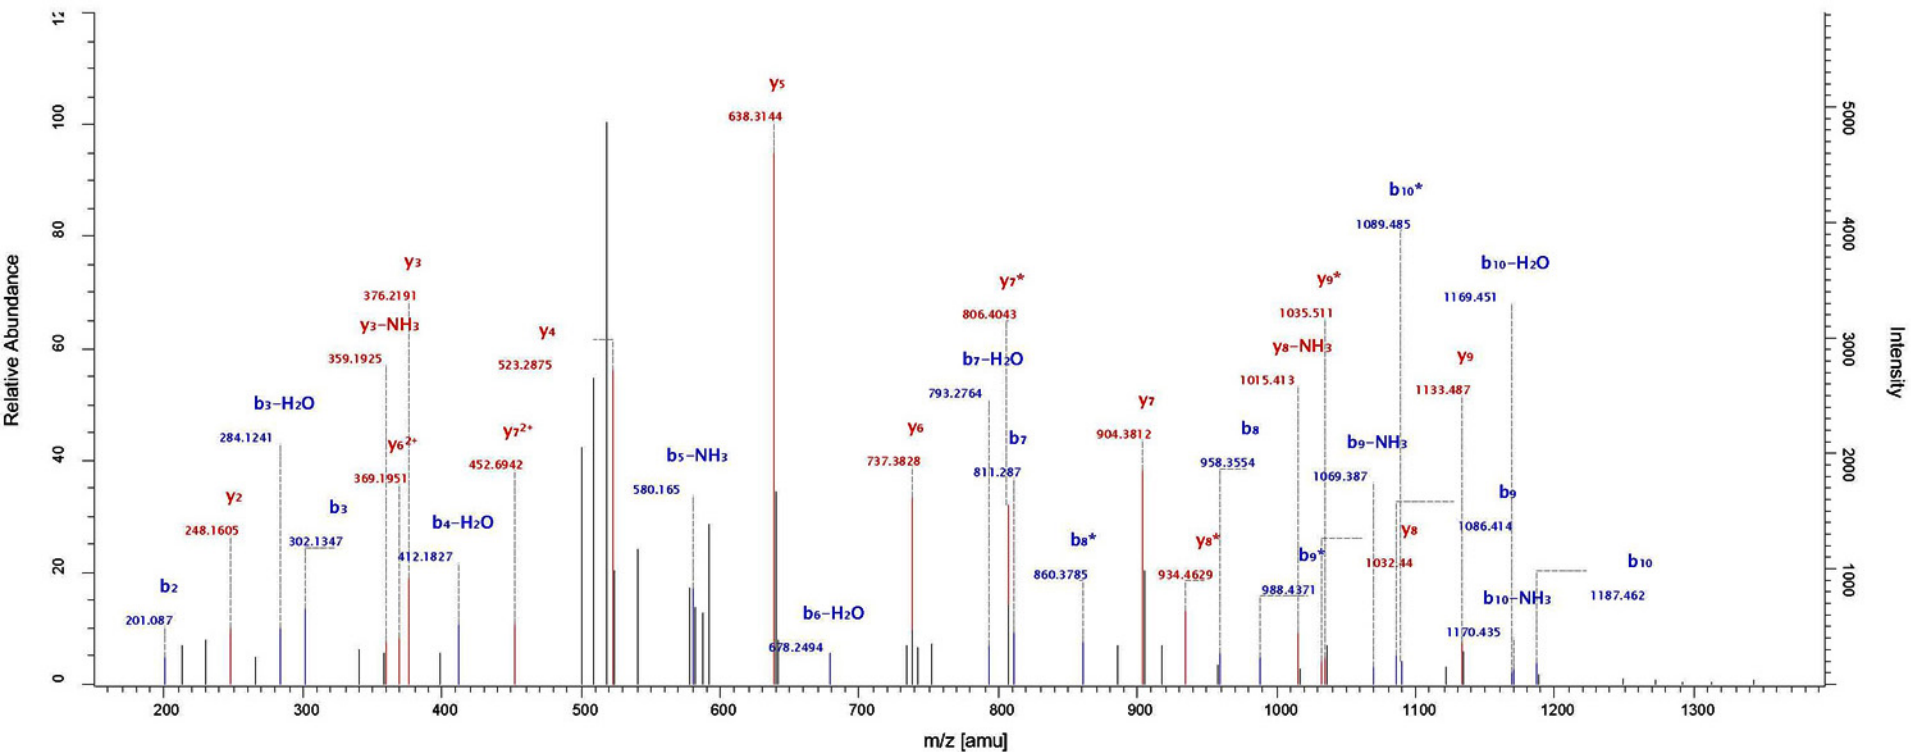



# H9AXB3/ Q9ST57

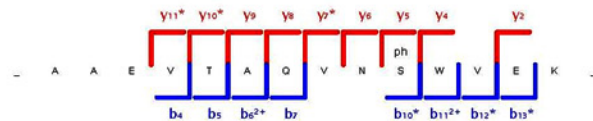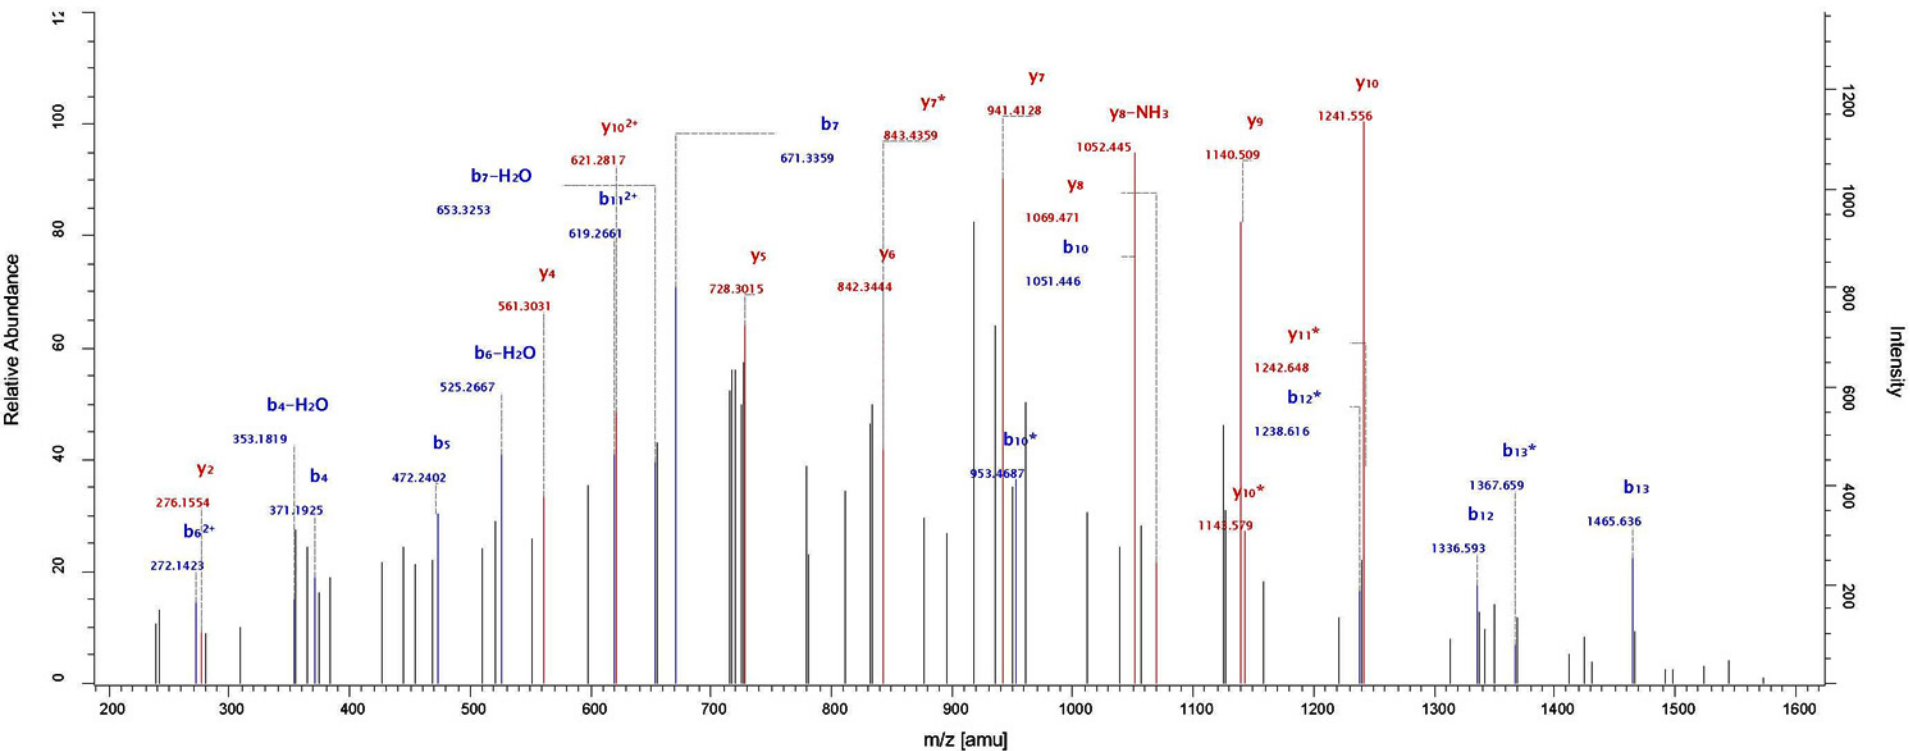

# H9AXB3/Q9ST57

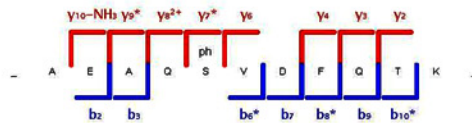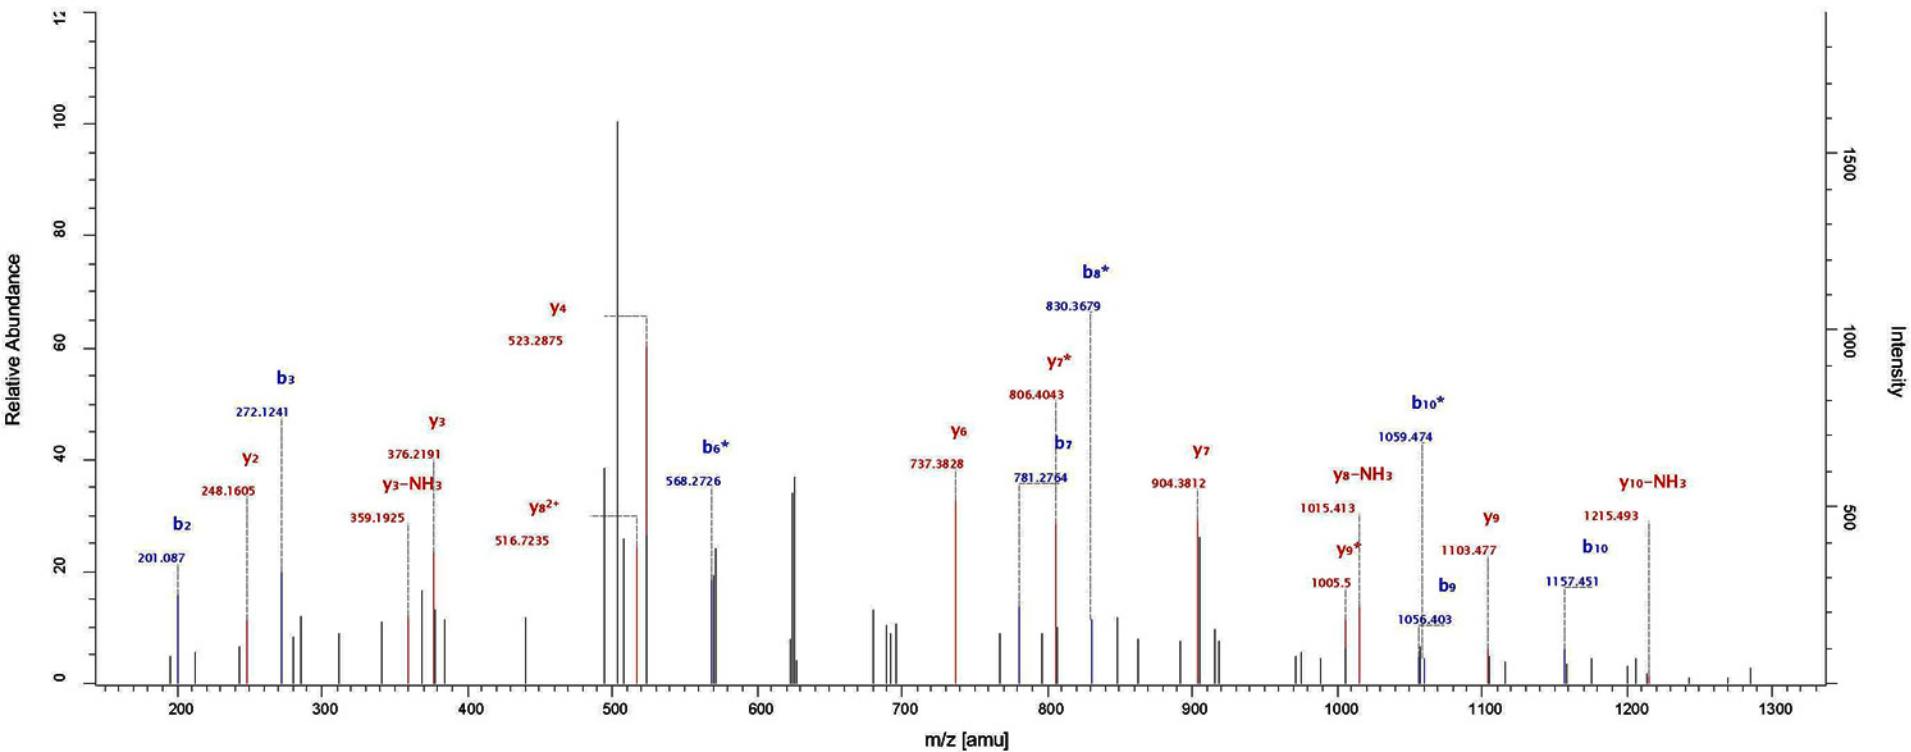

# H9AXB3

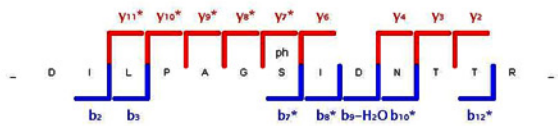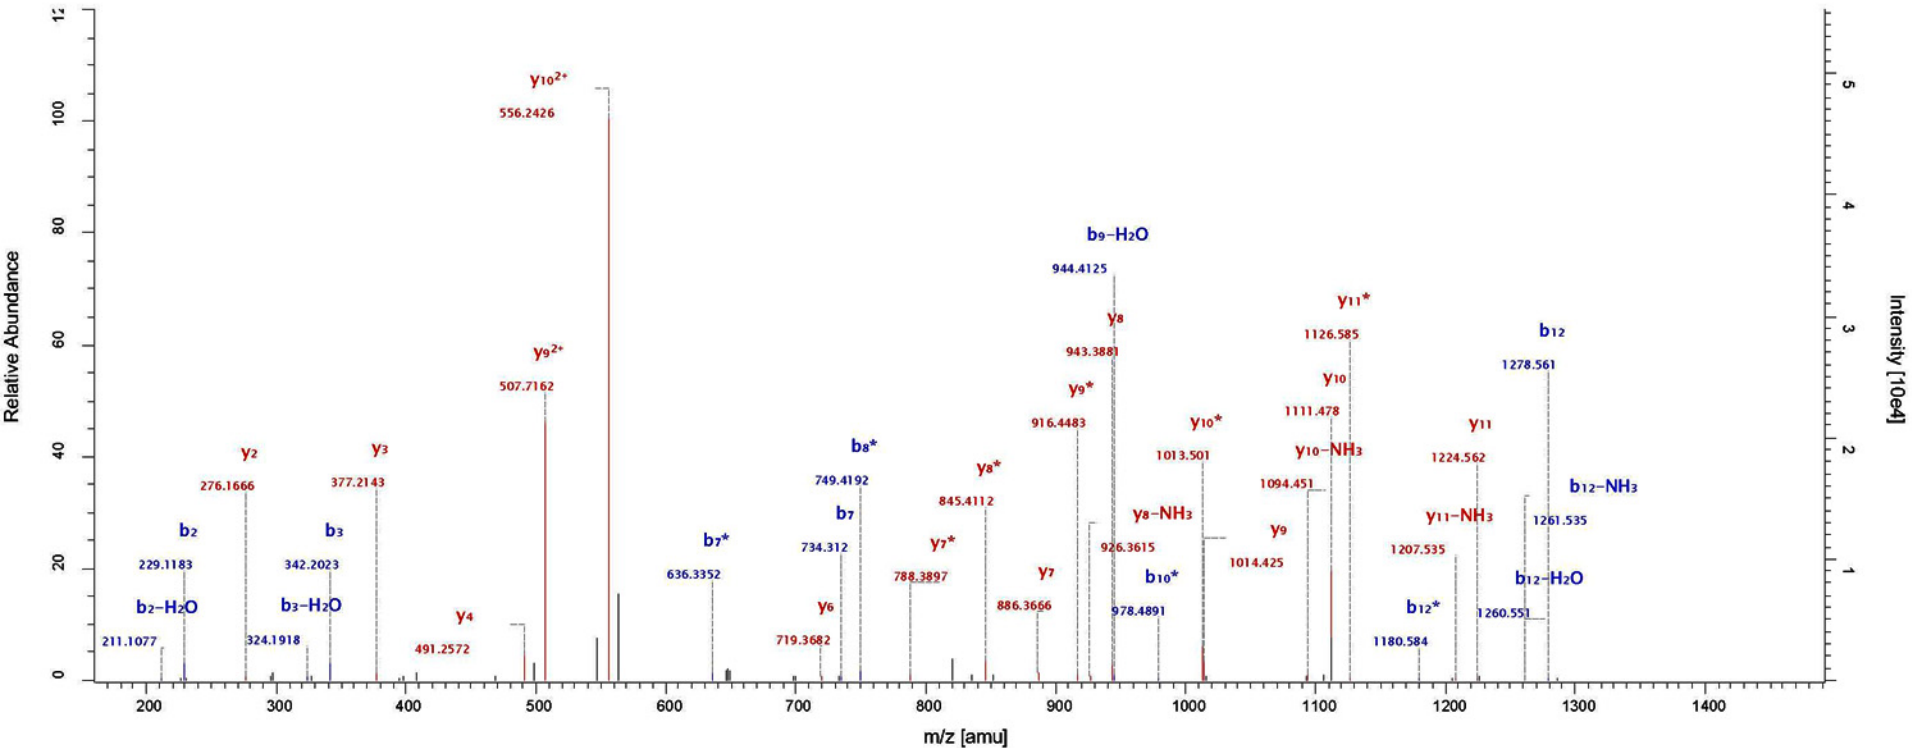

# E0WC53

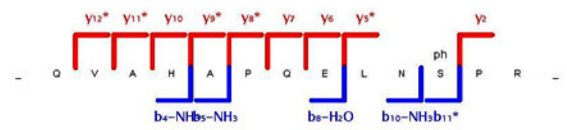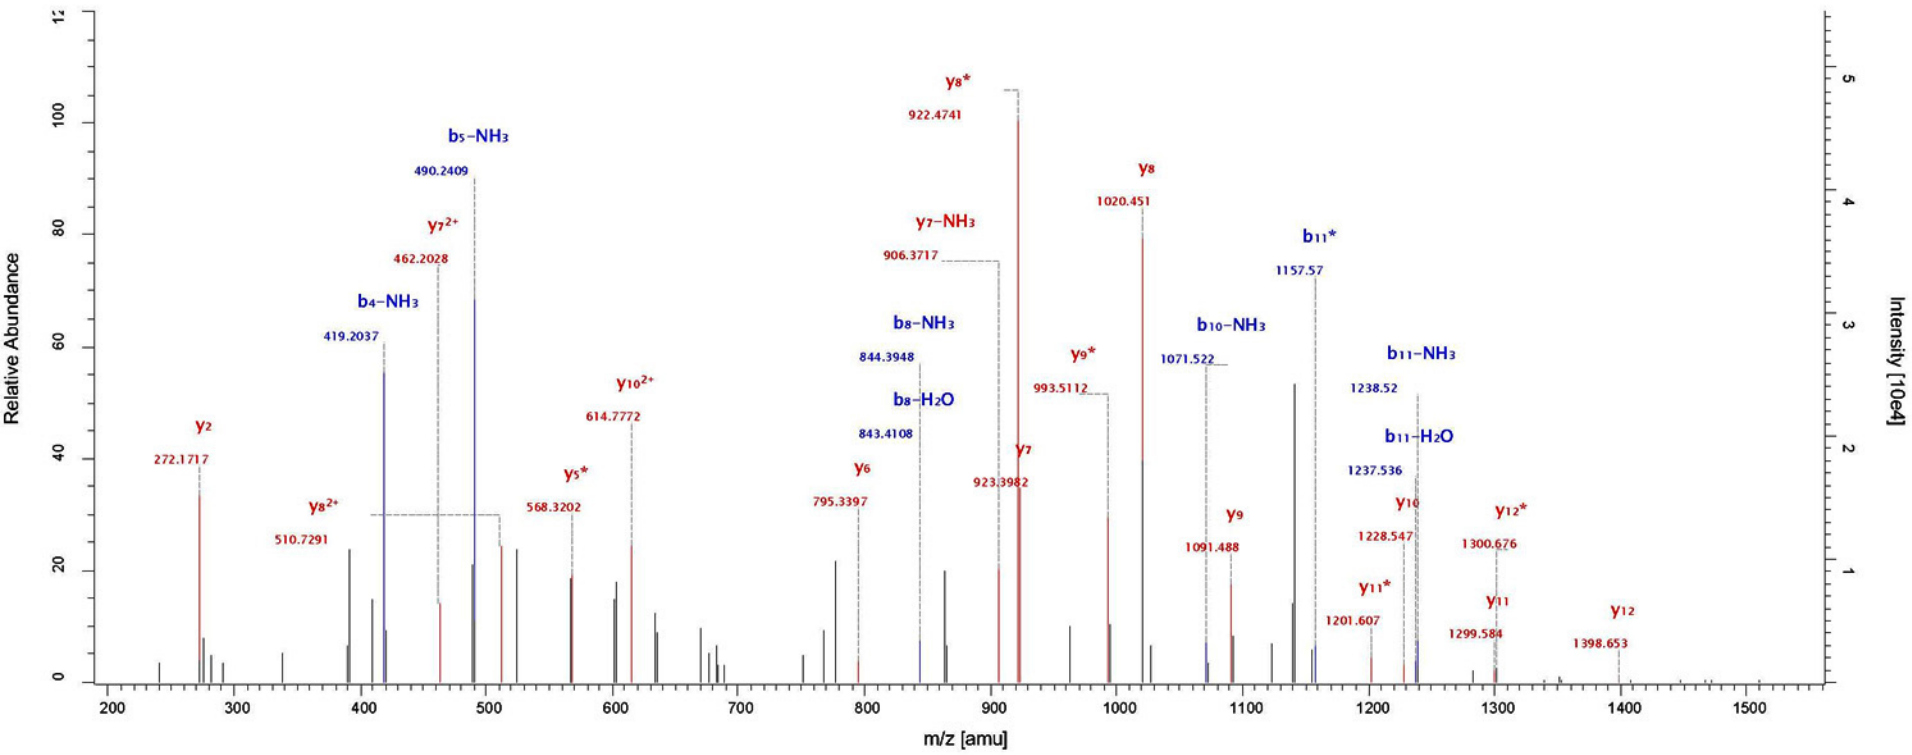

# E0WC53

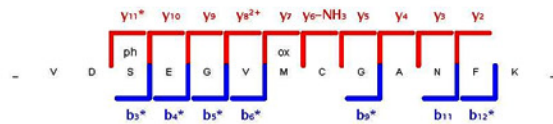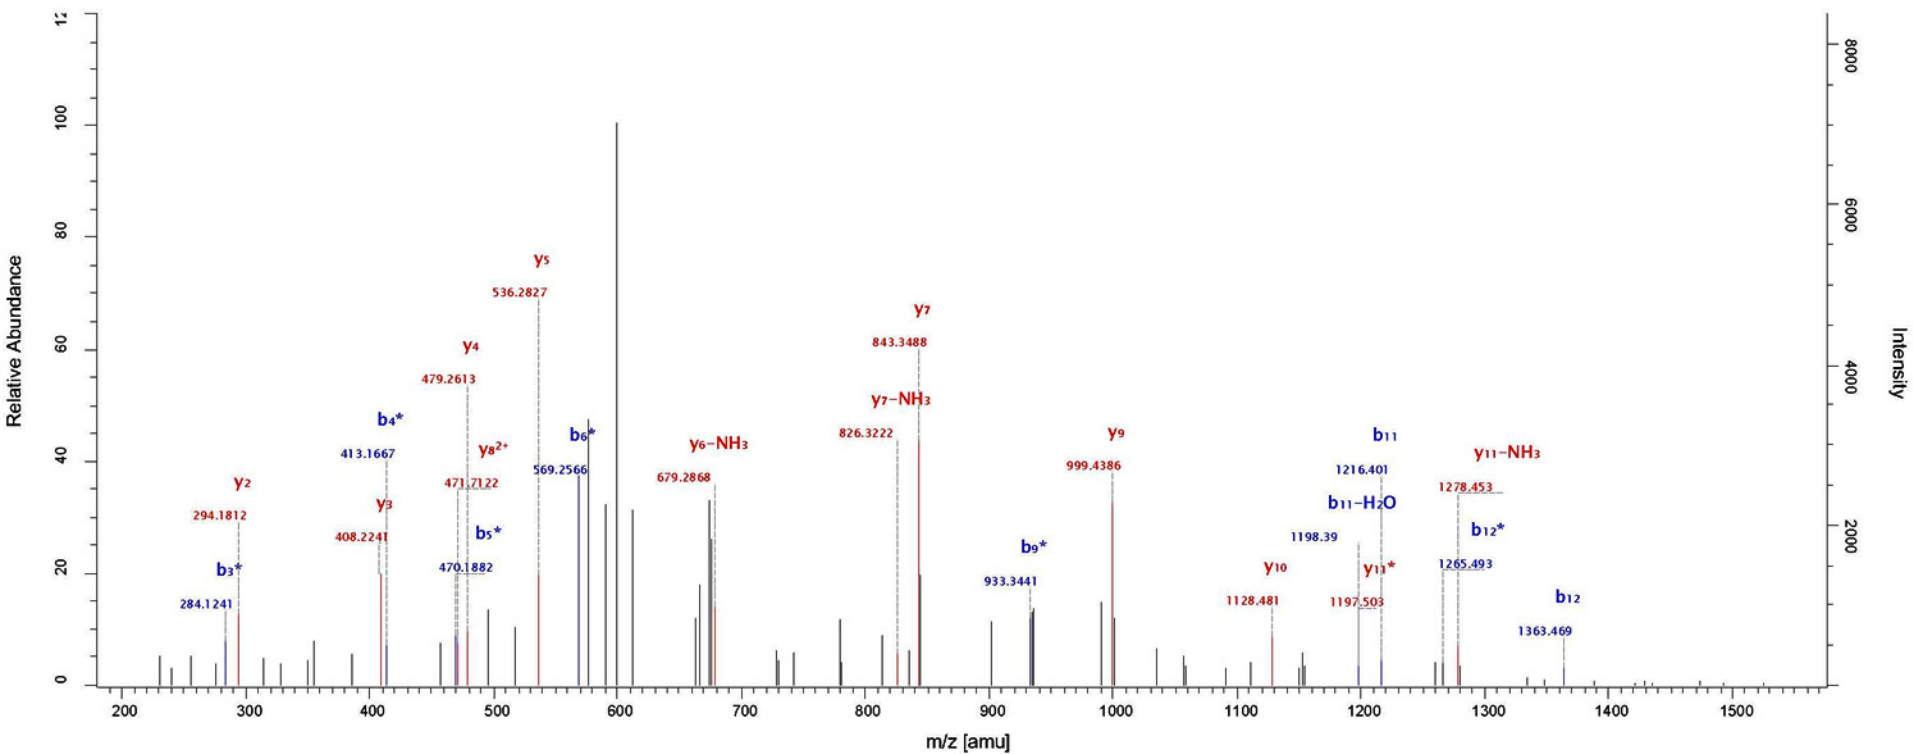

# E0WC53

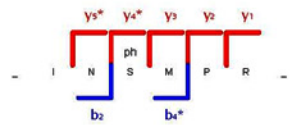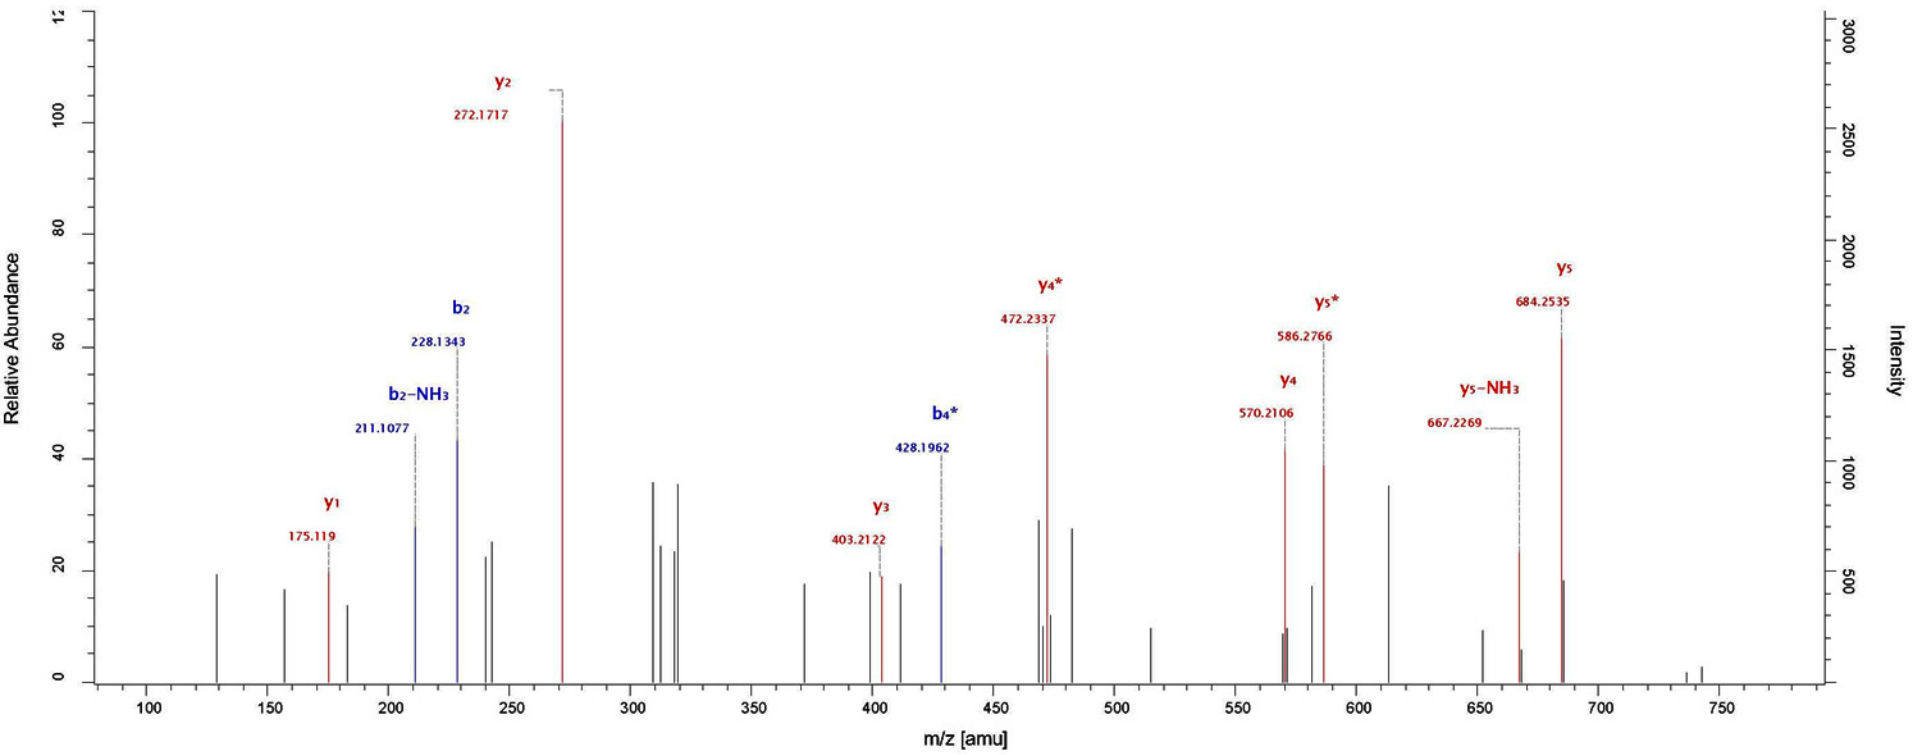

# F4Y591

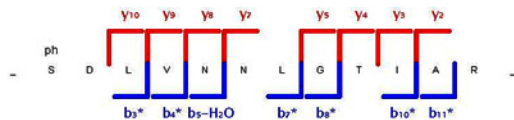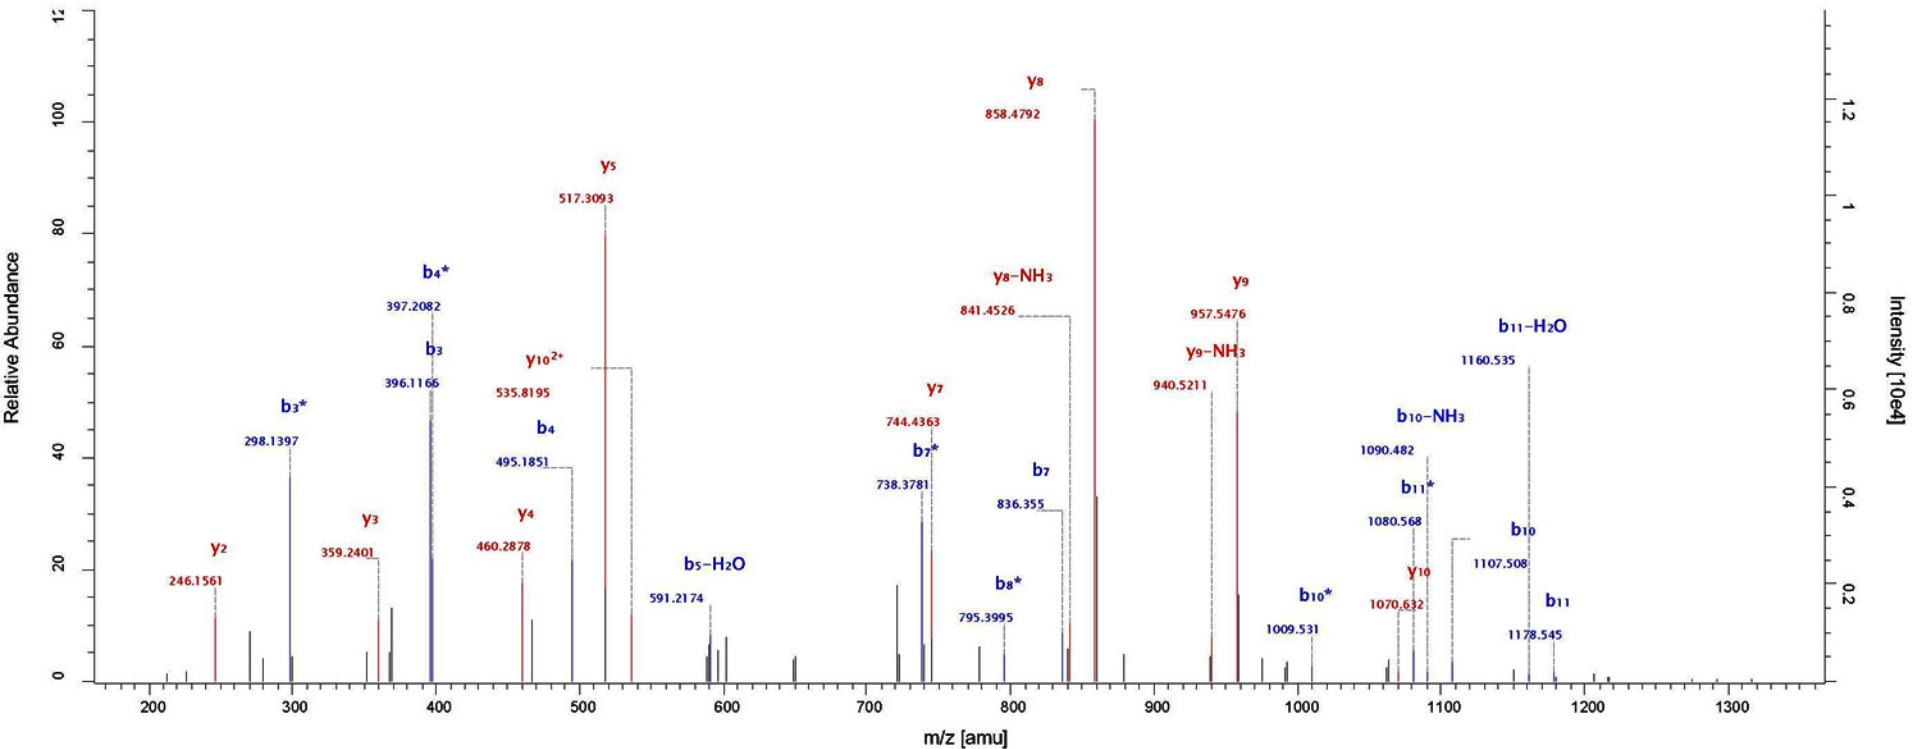

# F4Y591

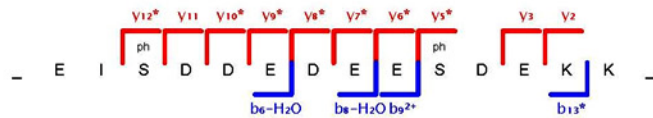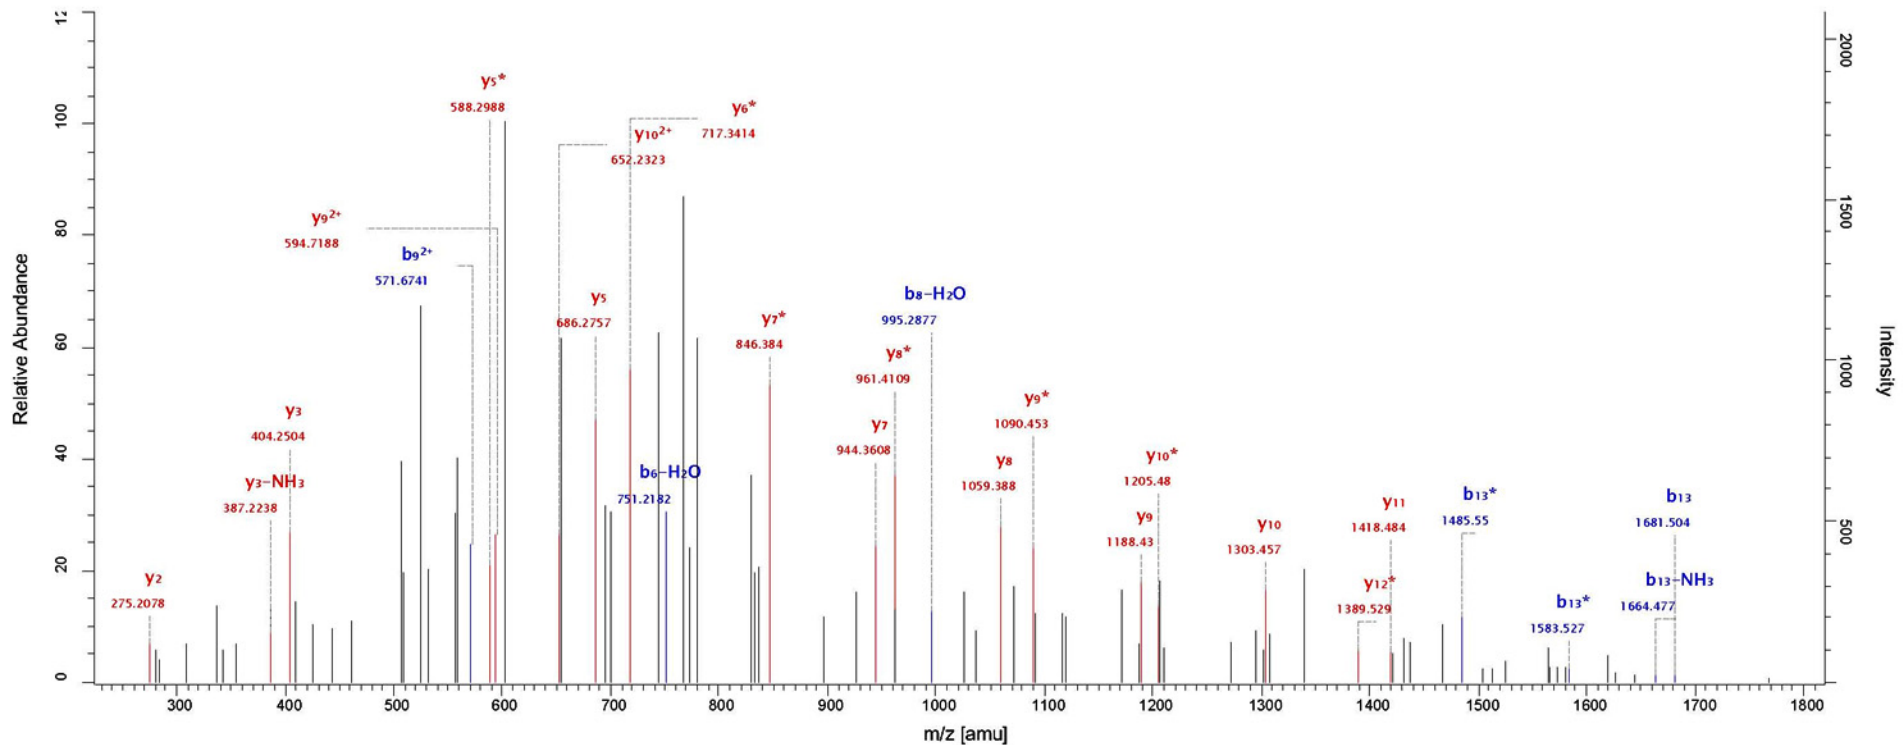



# F4Y591

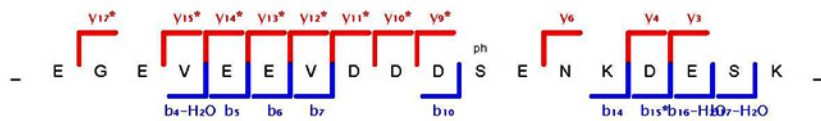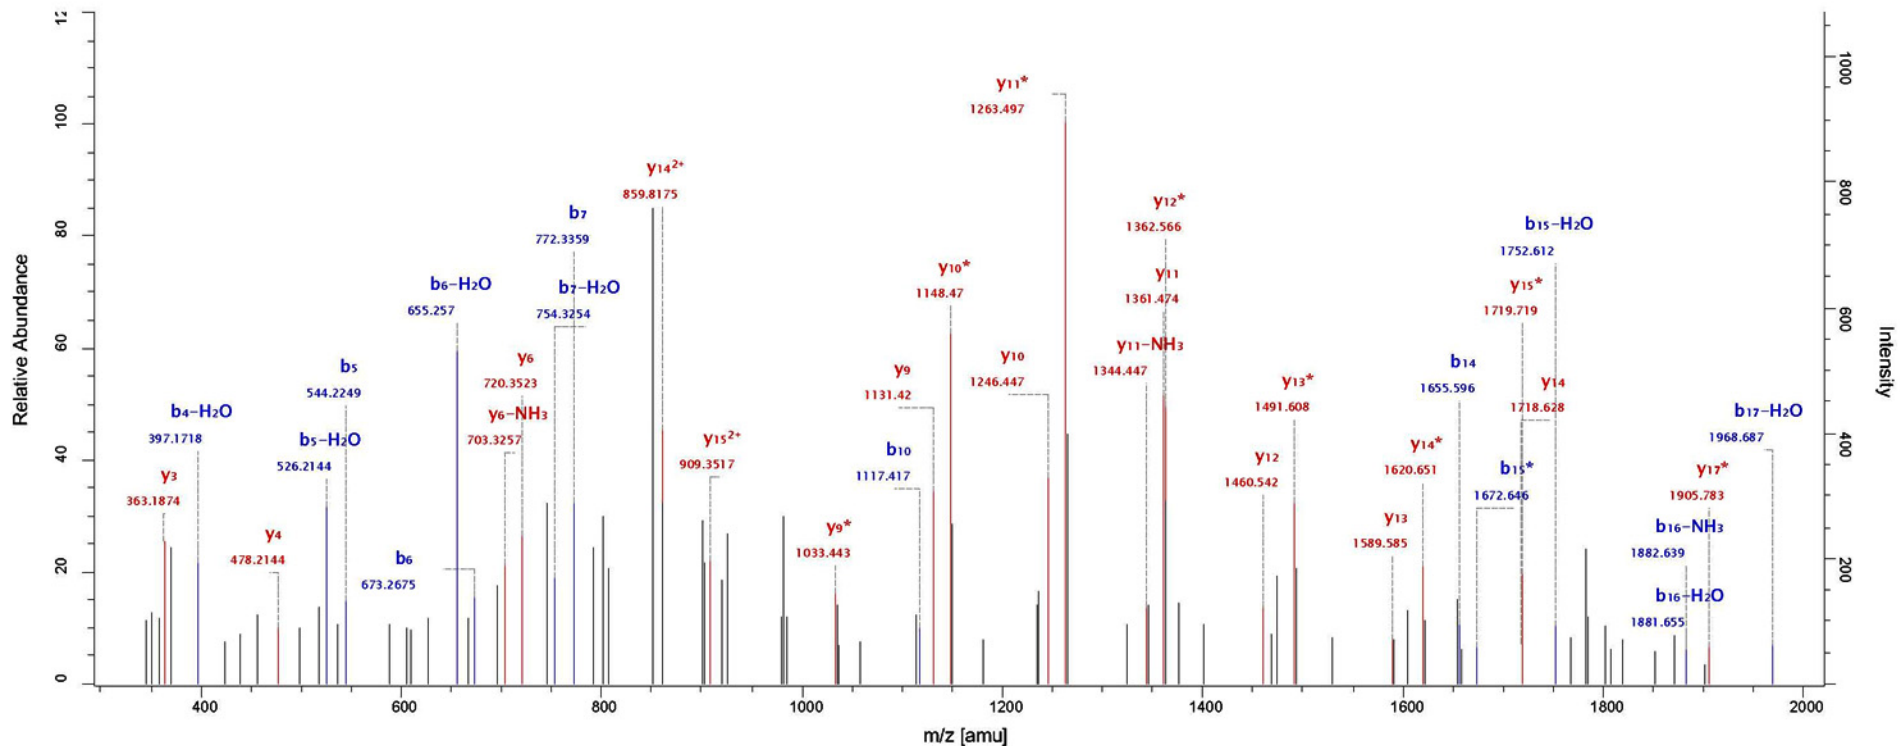

# Q8LRU5

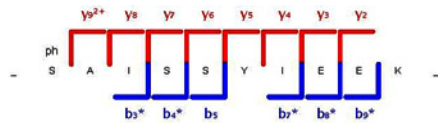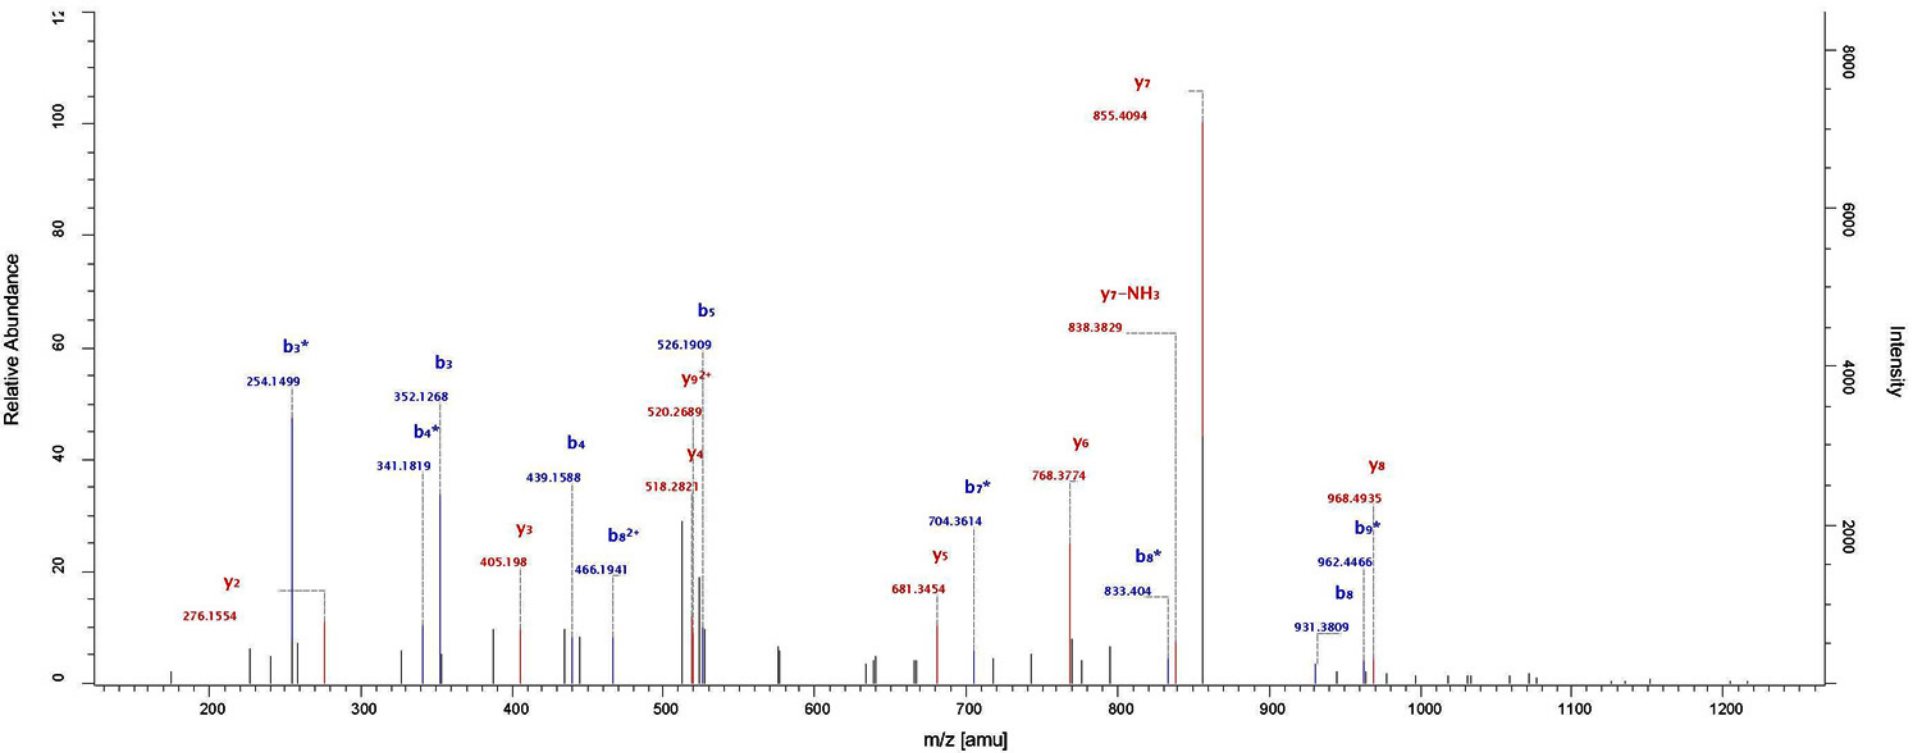

# DOEY60

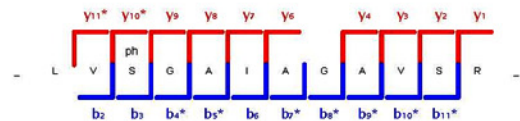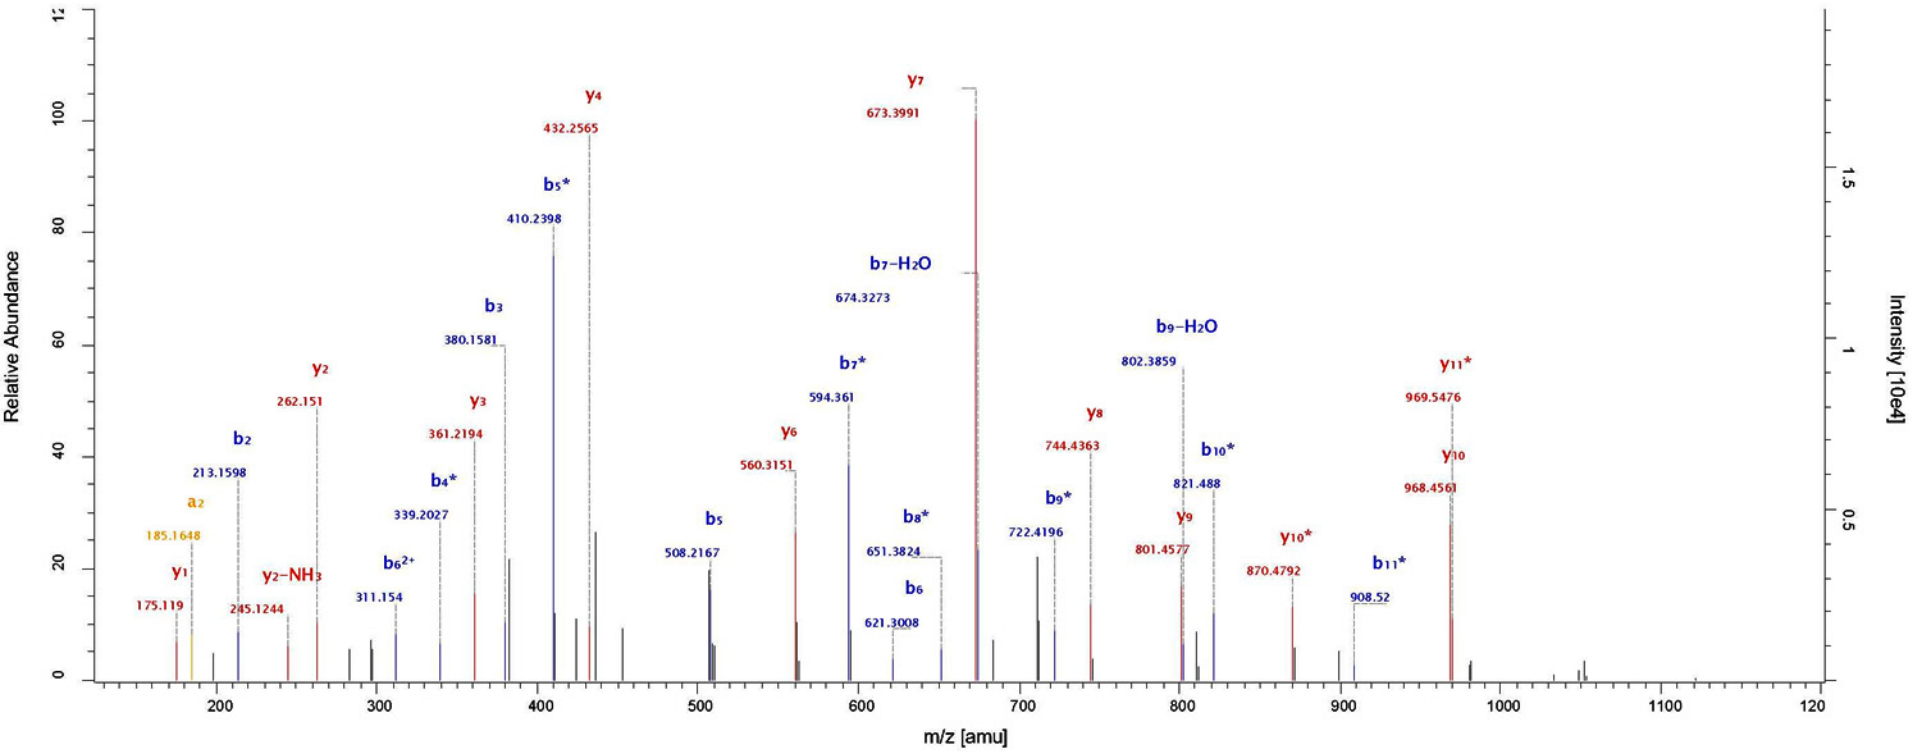

P08823

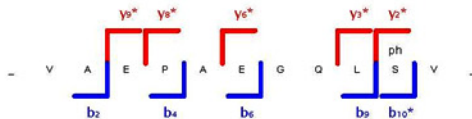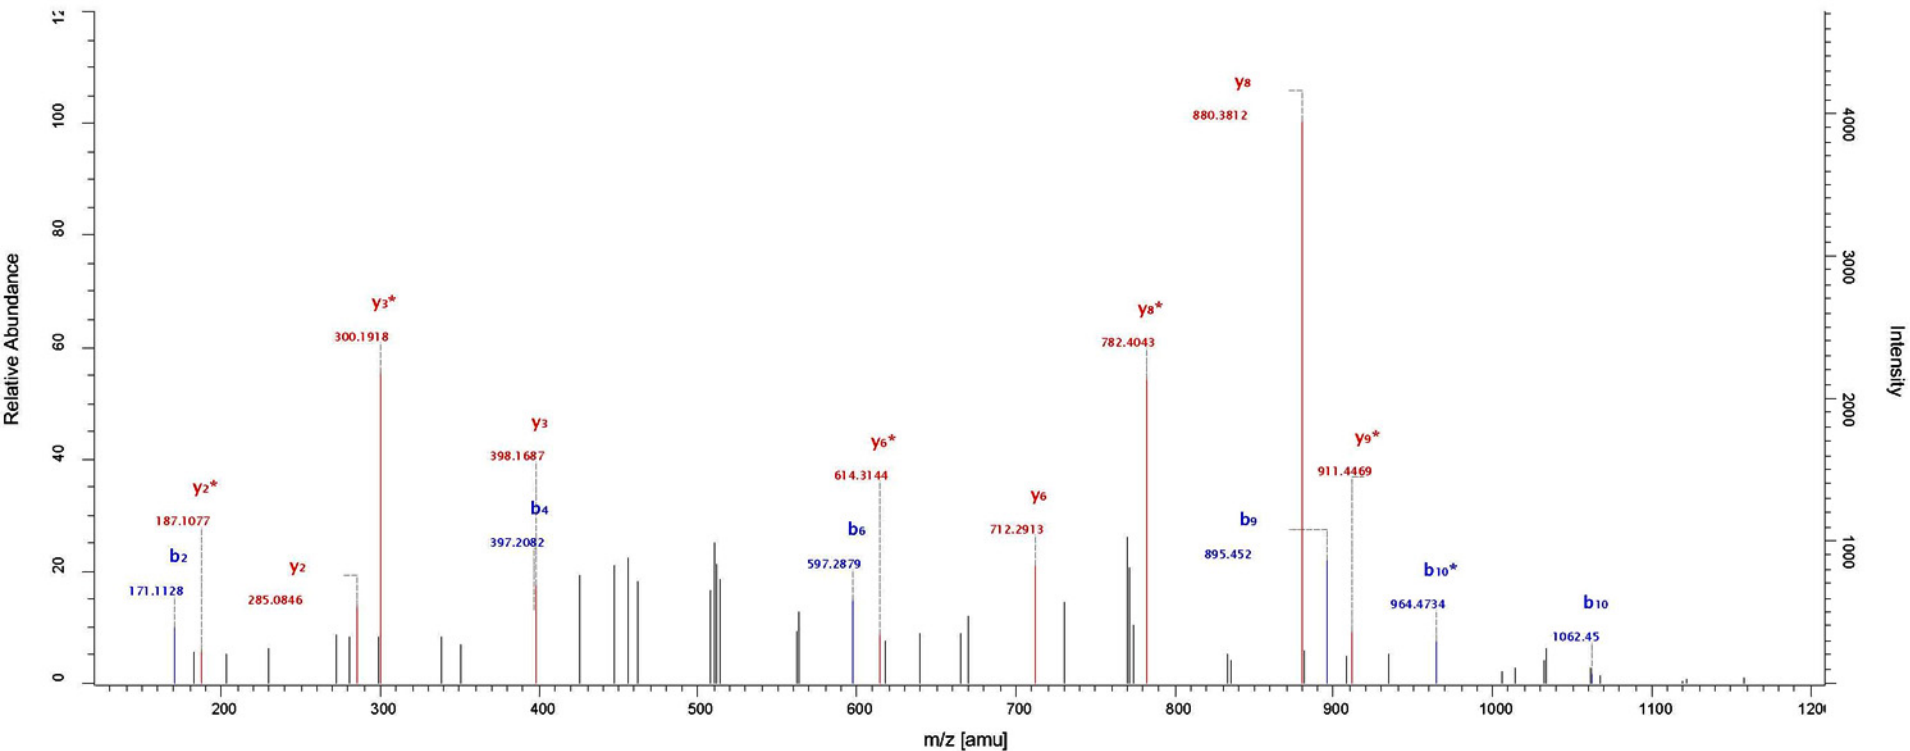

# Q0Q5D9

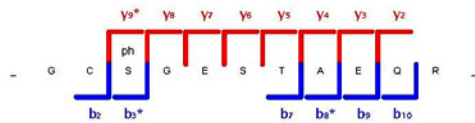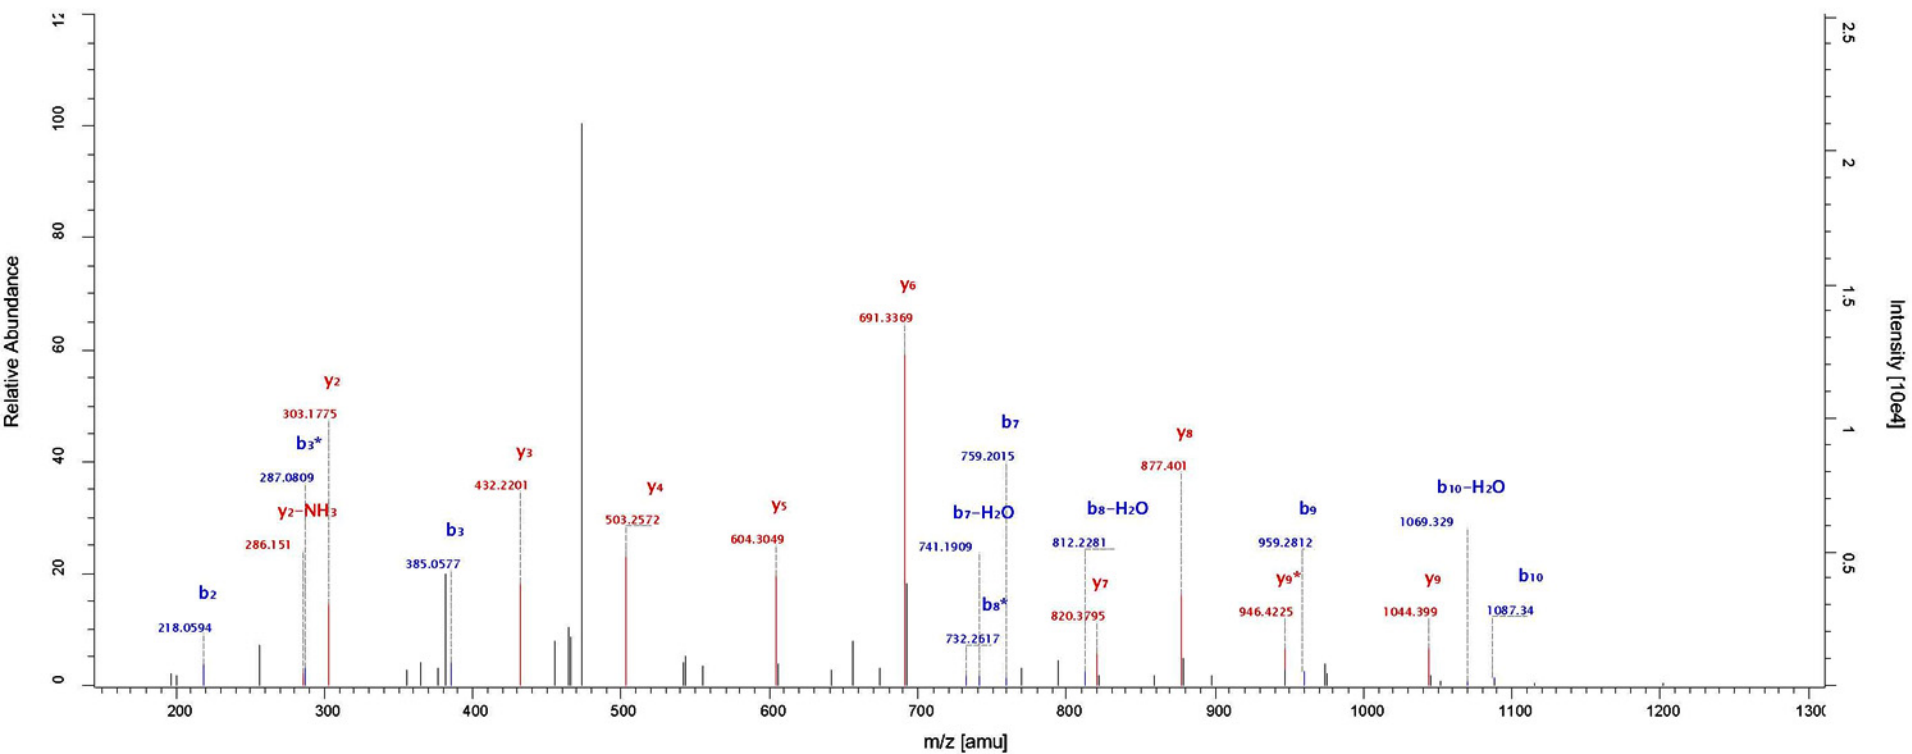

# Q43657

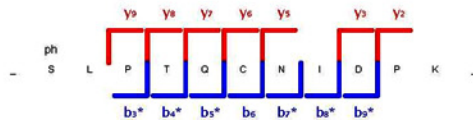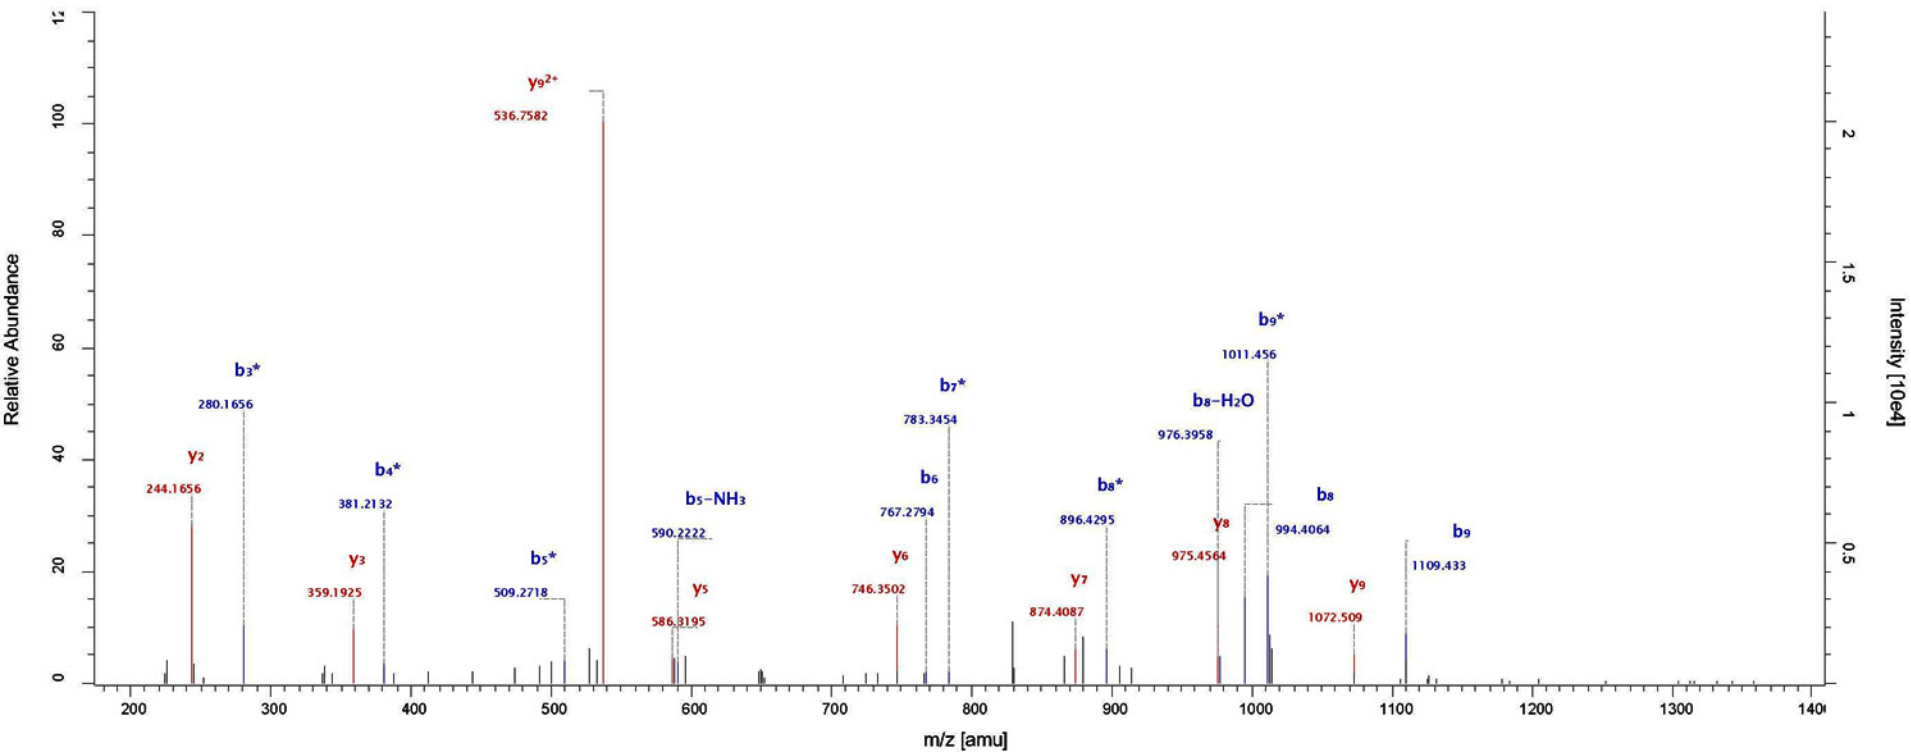

Supplement: 12864_2014_6842_MOESM9_ESM.pdf [file 12864_2014_6842_MOESM9_ESM.pdf]
