# Supplementary material for: iTRAQ-based quantitative proteome and phosphoprotein characterization reveals the central metabolism changes involved in wheat grain development
Source: PubMed Central journal article supplement (PMC4301063; doi:10.1186/1471-2164-15-1029), 2014-11-27
Supplement: 12864_2014_6842_MOESM6_ESM.pdf [file 12864_2014_6842_MOESM6_ESM.pdf]

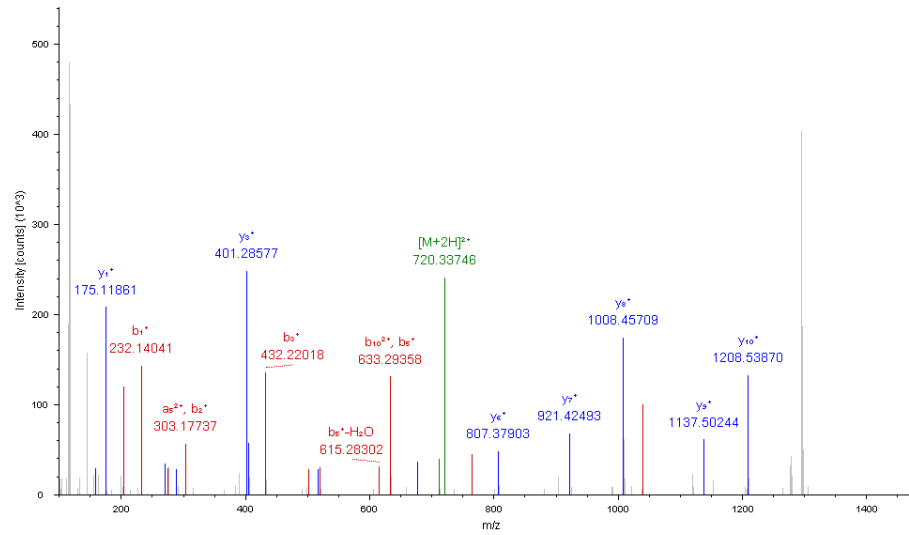

## 1. Fructose-bisphosphate aldolase

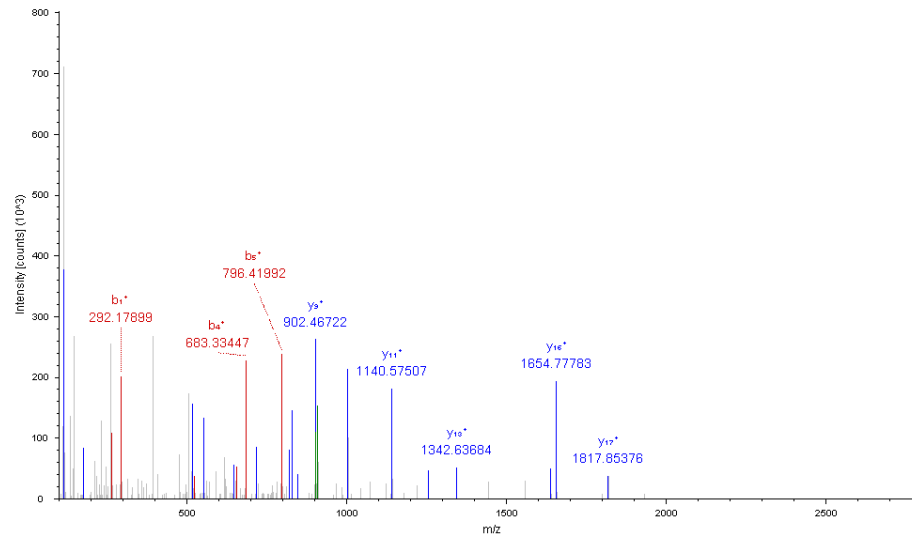

## 2. Lipoxygenase

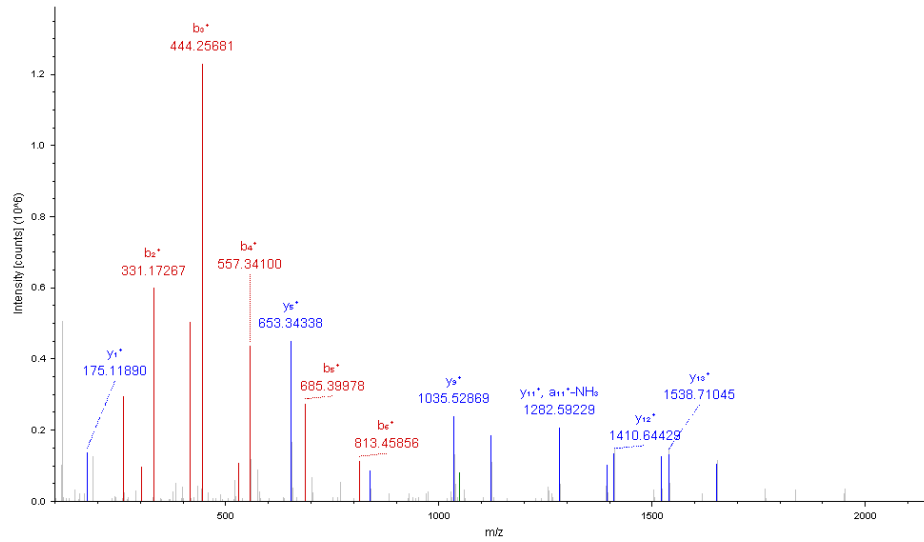

### 3. Gliadin/avenin-like seed protein

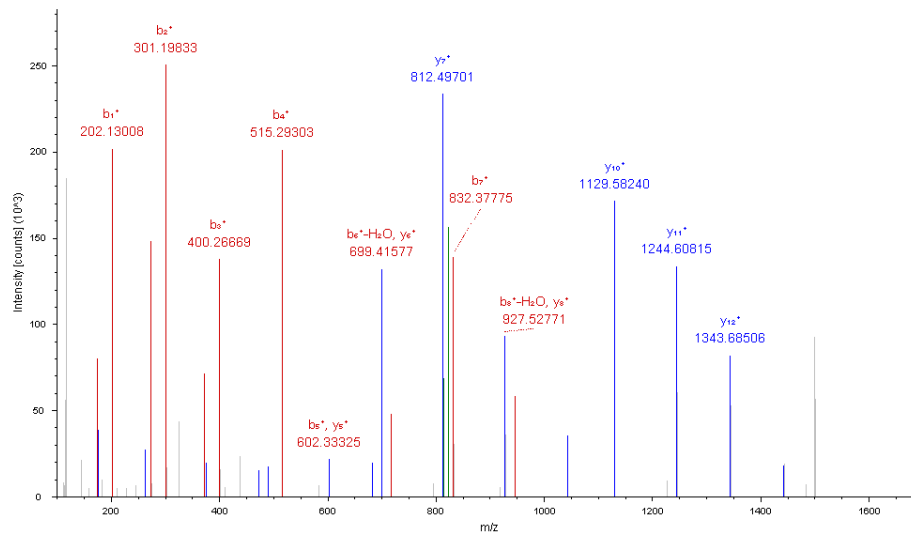

### 4. Heat shock protein 90

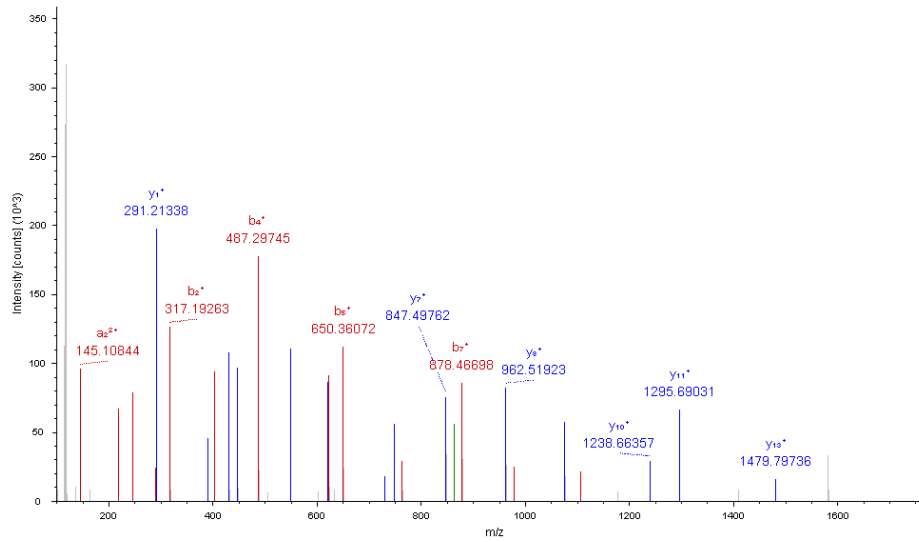

## 5. Starch branching enzyme 1

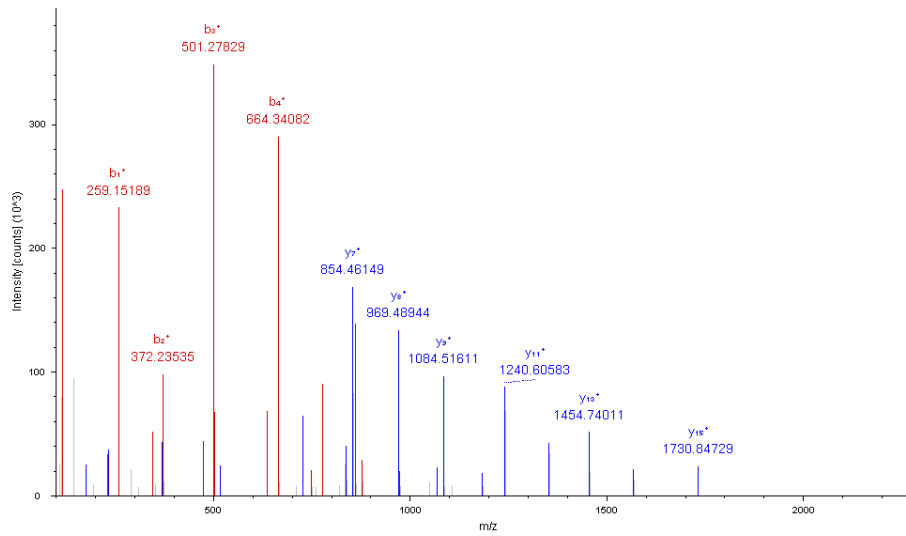

## 6. Beta-amylase

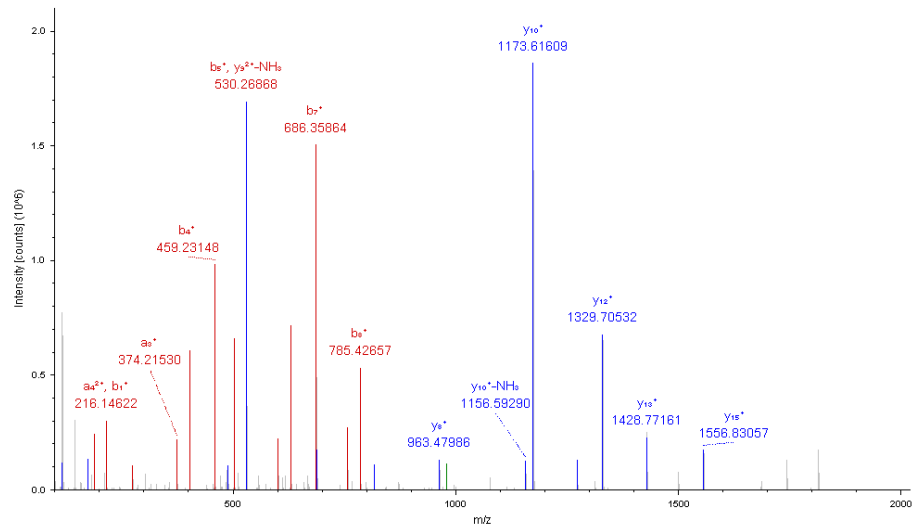

## 7. Globulin 1

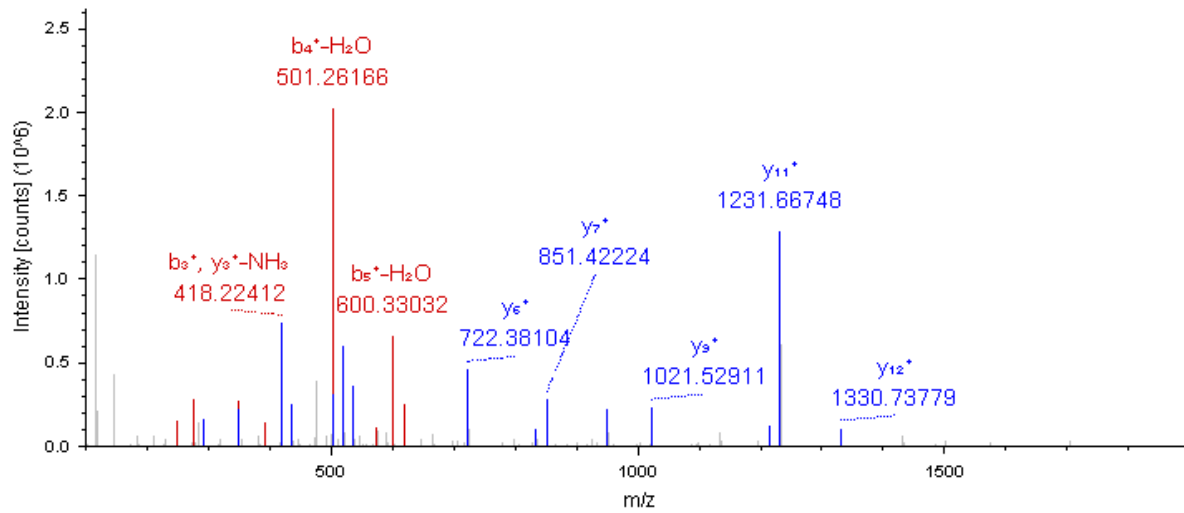

## 8. Sucrose synthase

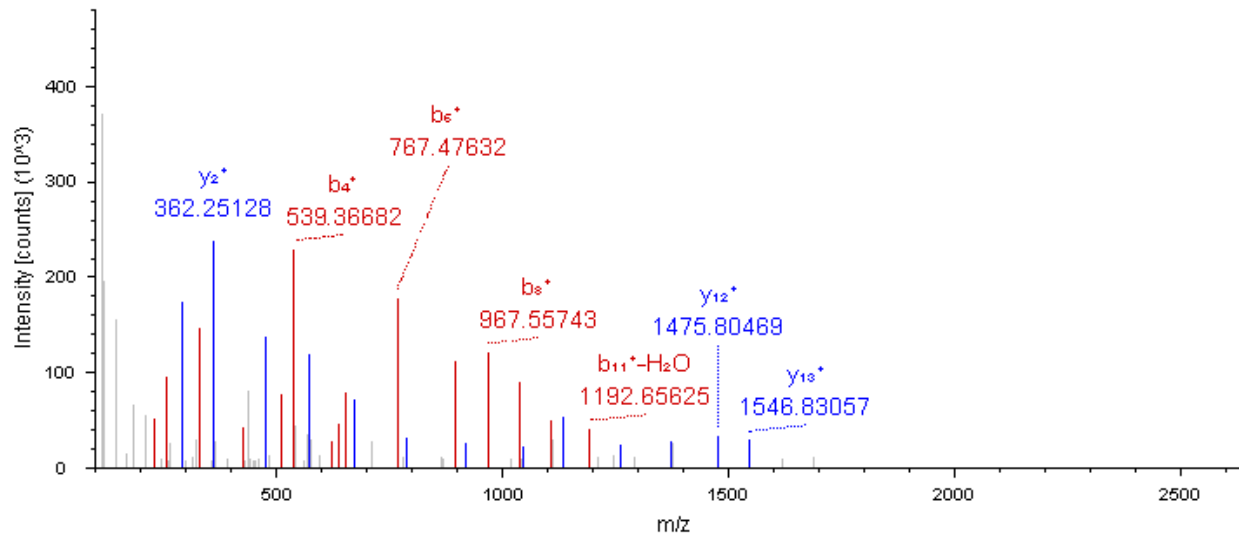

9. Protein disulfide isomerase

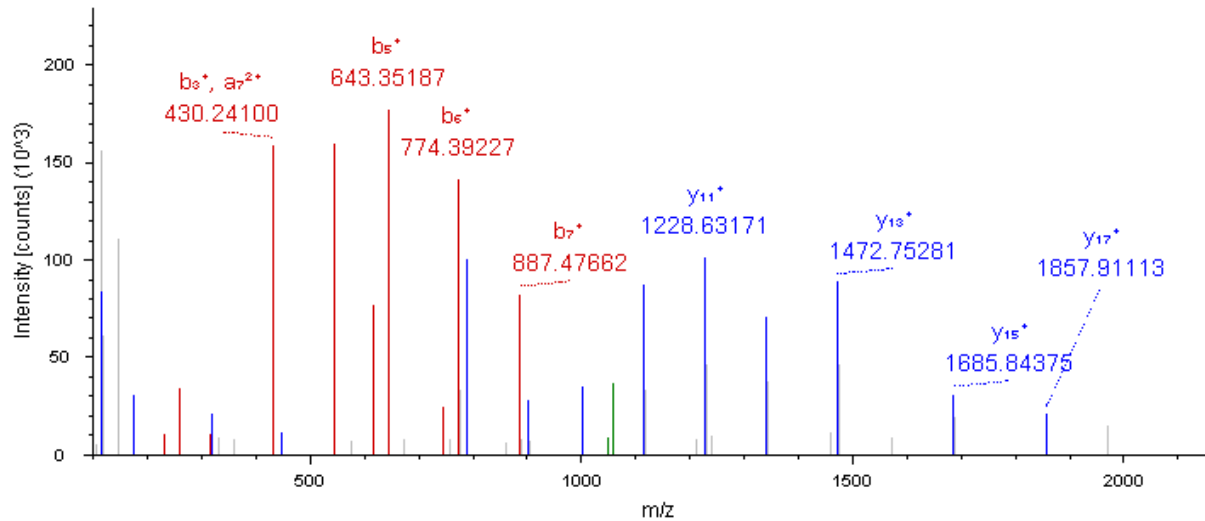

10. Glucose-1-phosphate adenylyltransferase

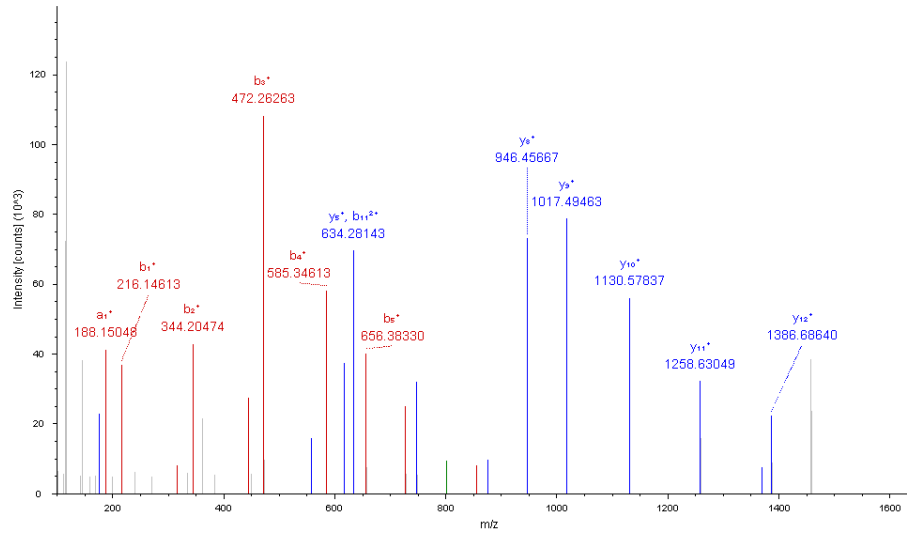

11 High-molecular-weight glutenin subunit Bx17

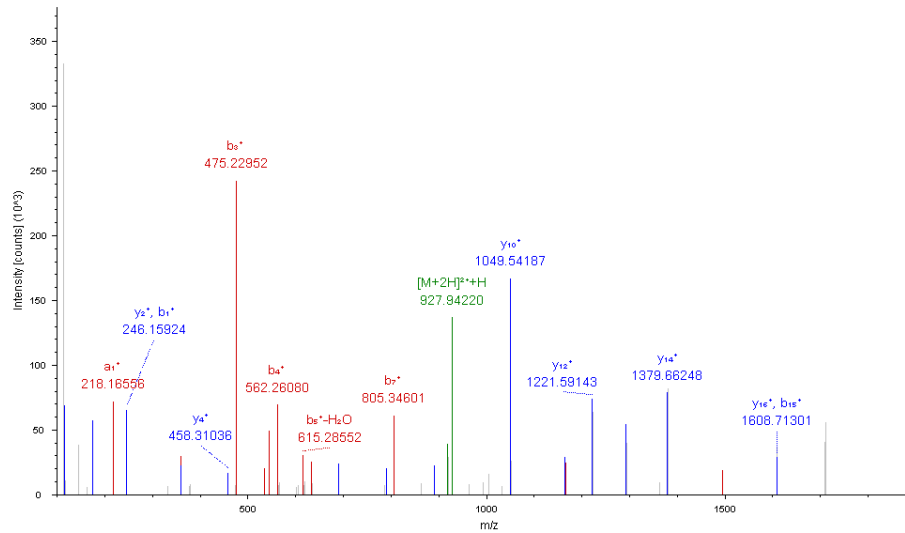

12. RuBisCO large subunit-binding protein subunit alpha
