# Supplementary material for: iTRAQ-based quantitative proteome and phosphoprotein characterization reveals the central metabolism changes involved in wheat grain development
Source: PubMed Central journal article supplement (PMC4301063; doi:10.1186/1471-2164-15-1029), 2014-11-27
Supplement: 12864_2014_6842_MOESM7_ESM.pdf [file 12864_2014_6842_MOESM7_ESM.pdf]

Figure S4-A

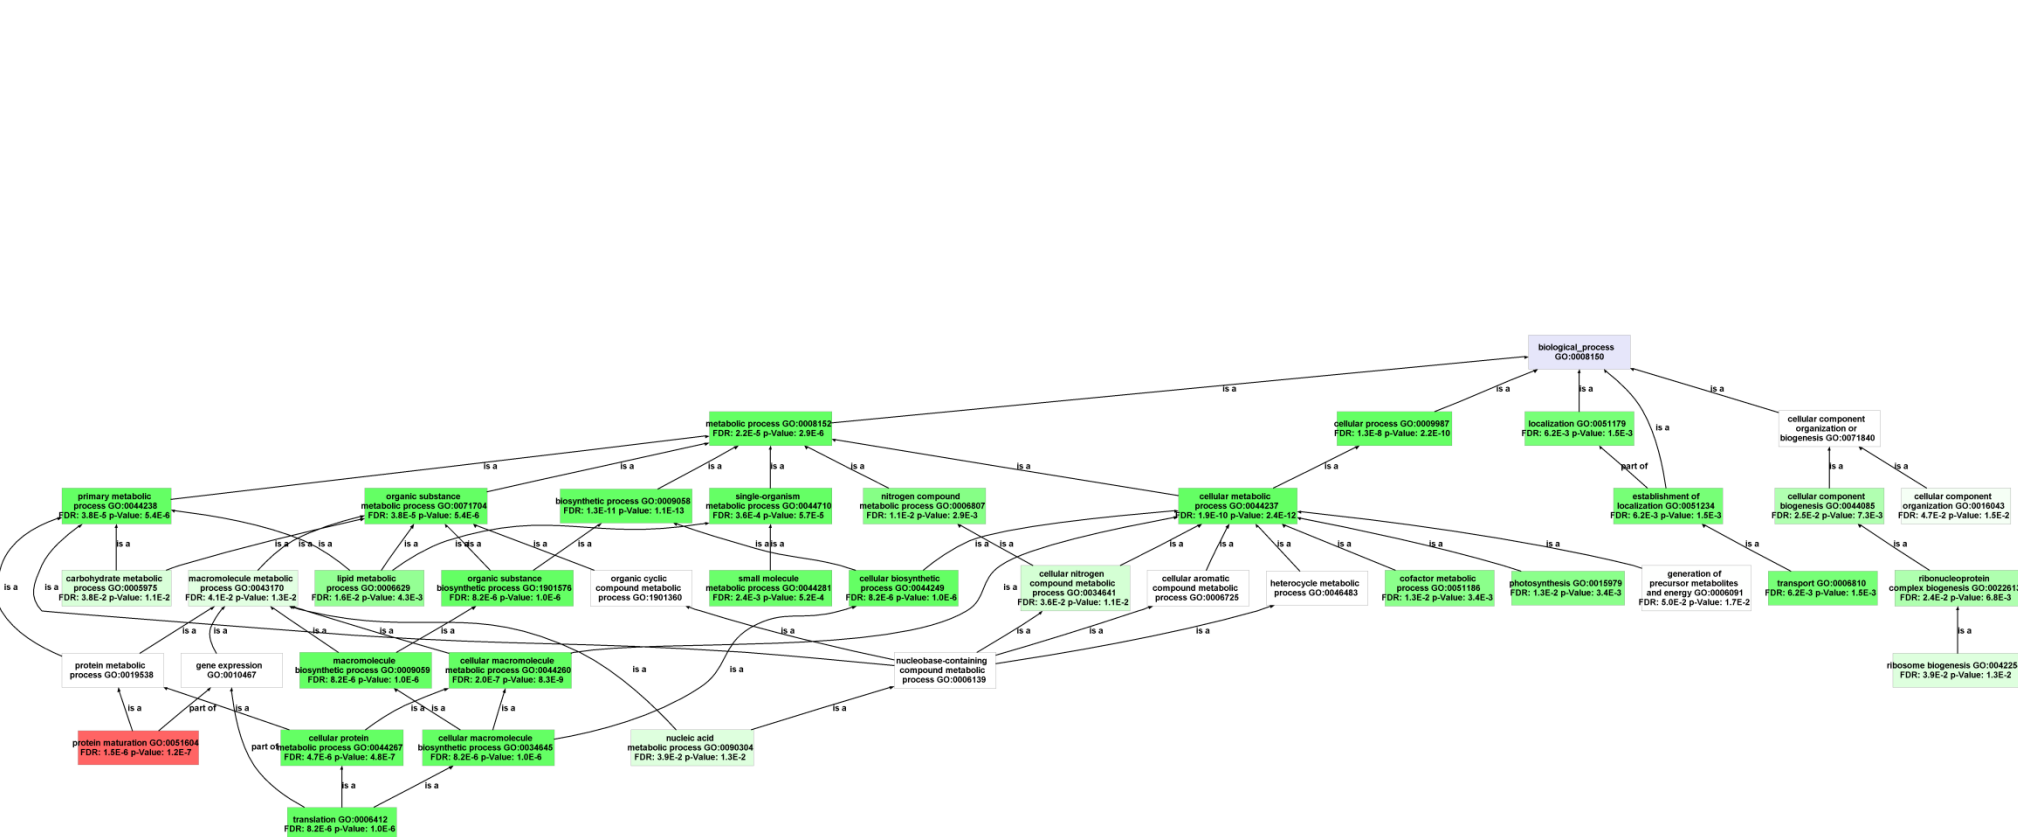

Enriched Graph

Figure S4-B

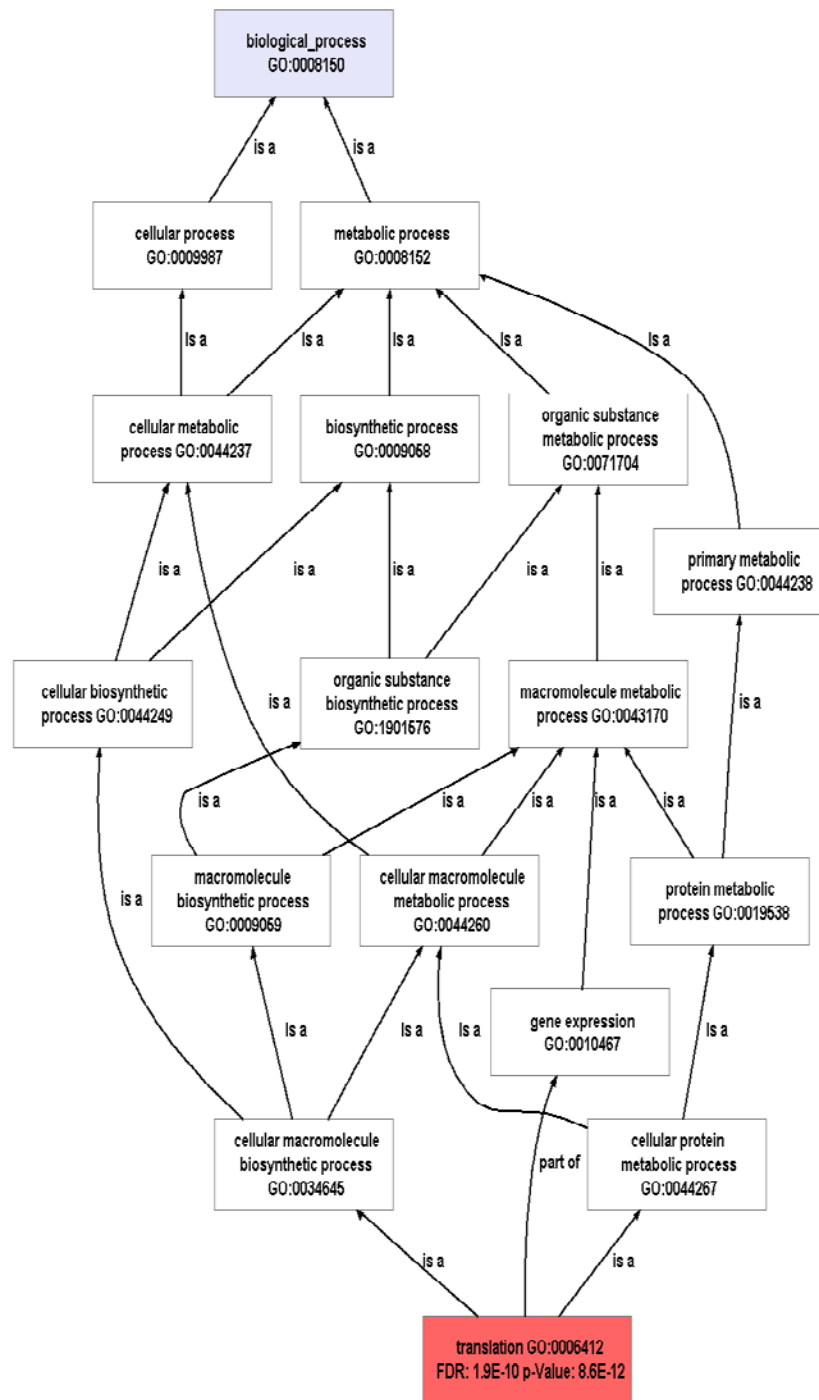

Figure S4-C

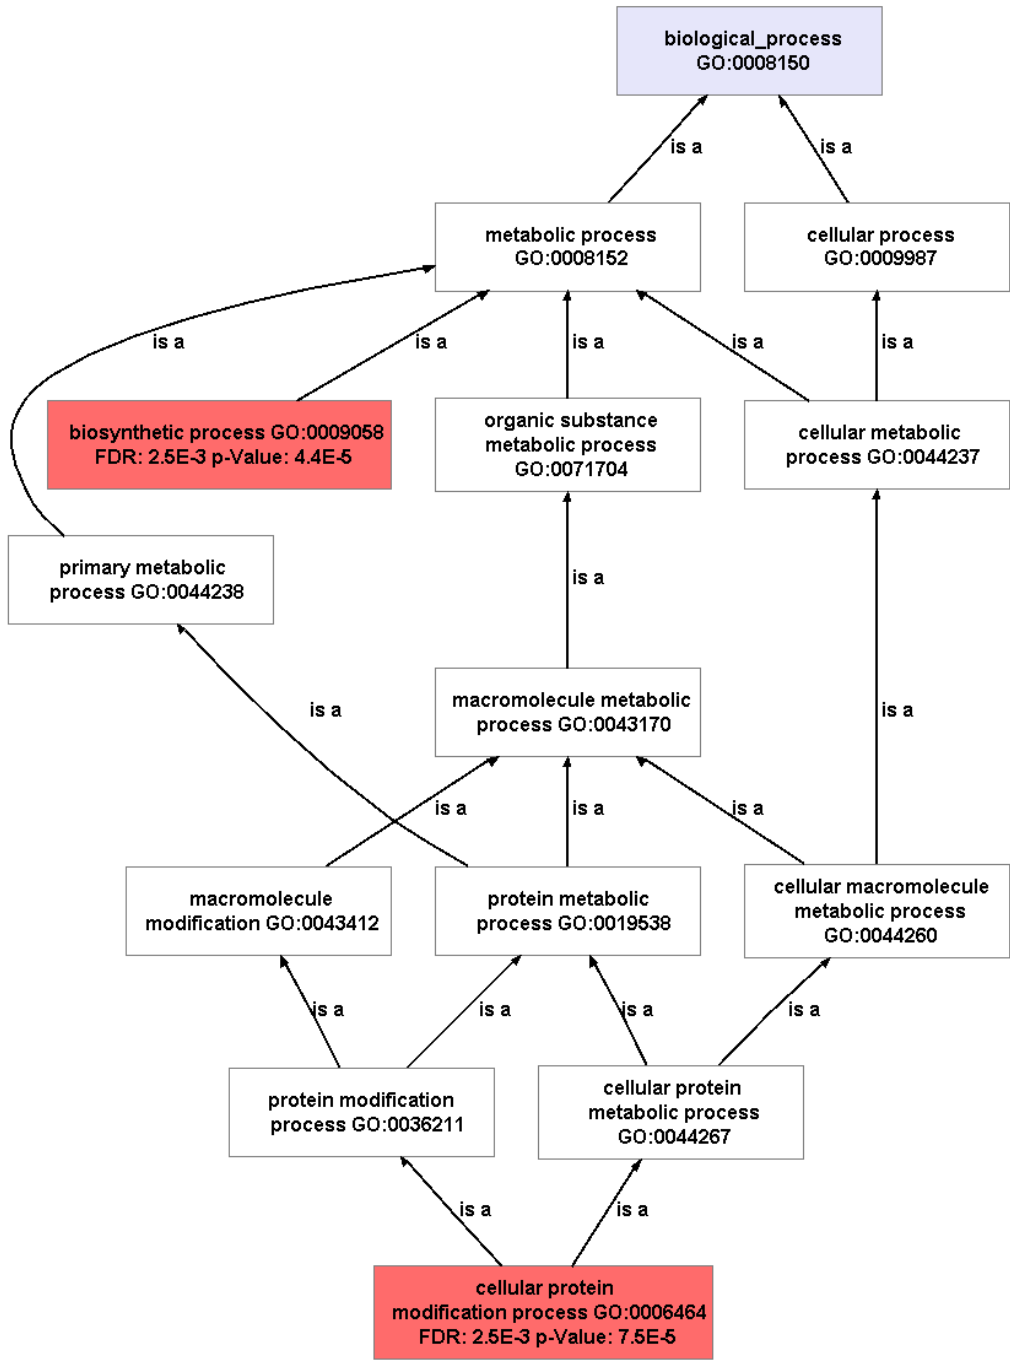

Enriched Graph
